# Supplementary material for: Extracellular Vesicles From the Human Natural Killer Cell Line NK3.3 Have Broad and Potent Anti-Tumor Activity
Source: PubMed Central journal article supplement (PMC8343581; doi:10.3389/fcell.2021.698639), 2021-07-23

# Figure 2

30ug/lane

Lane 1: 293  
Lane 2: 3.3  
Lane 3: NK92

## Common EV Proteins

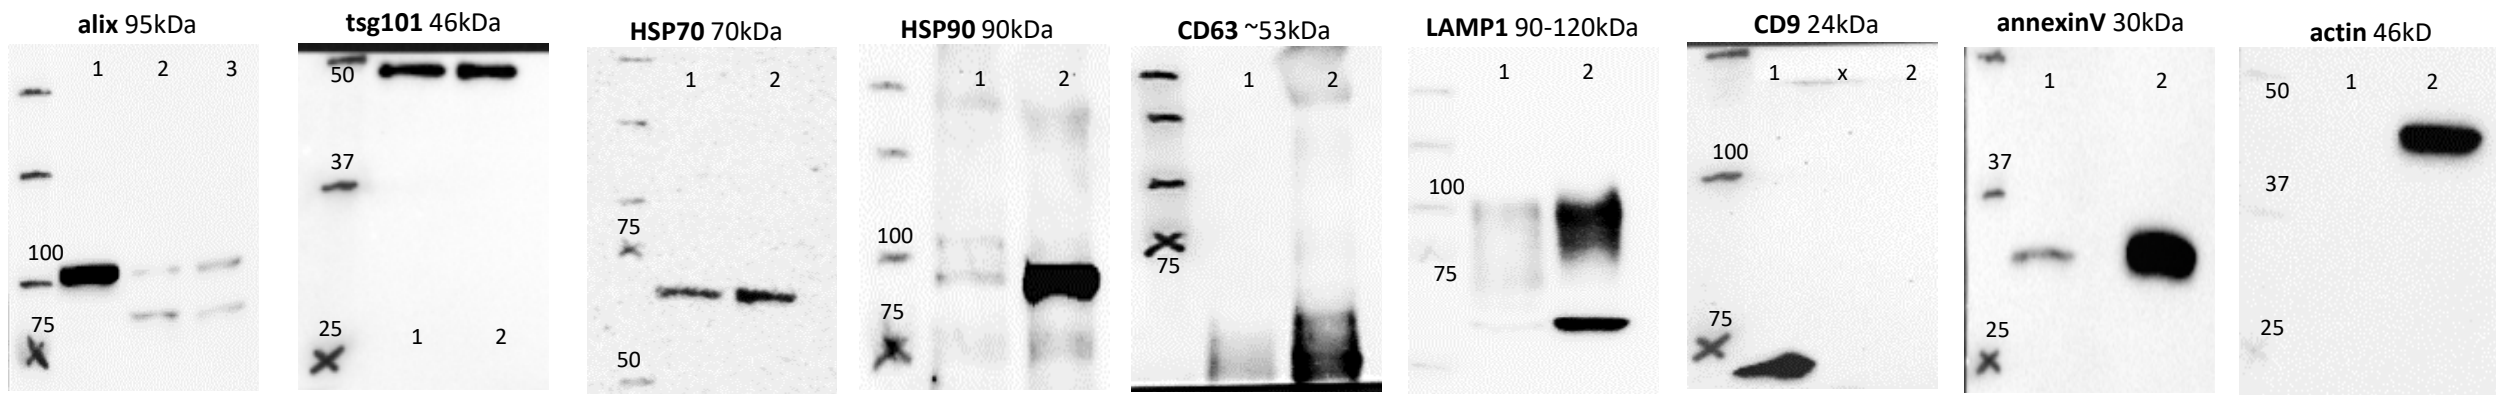

## NK-Specific Proteins

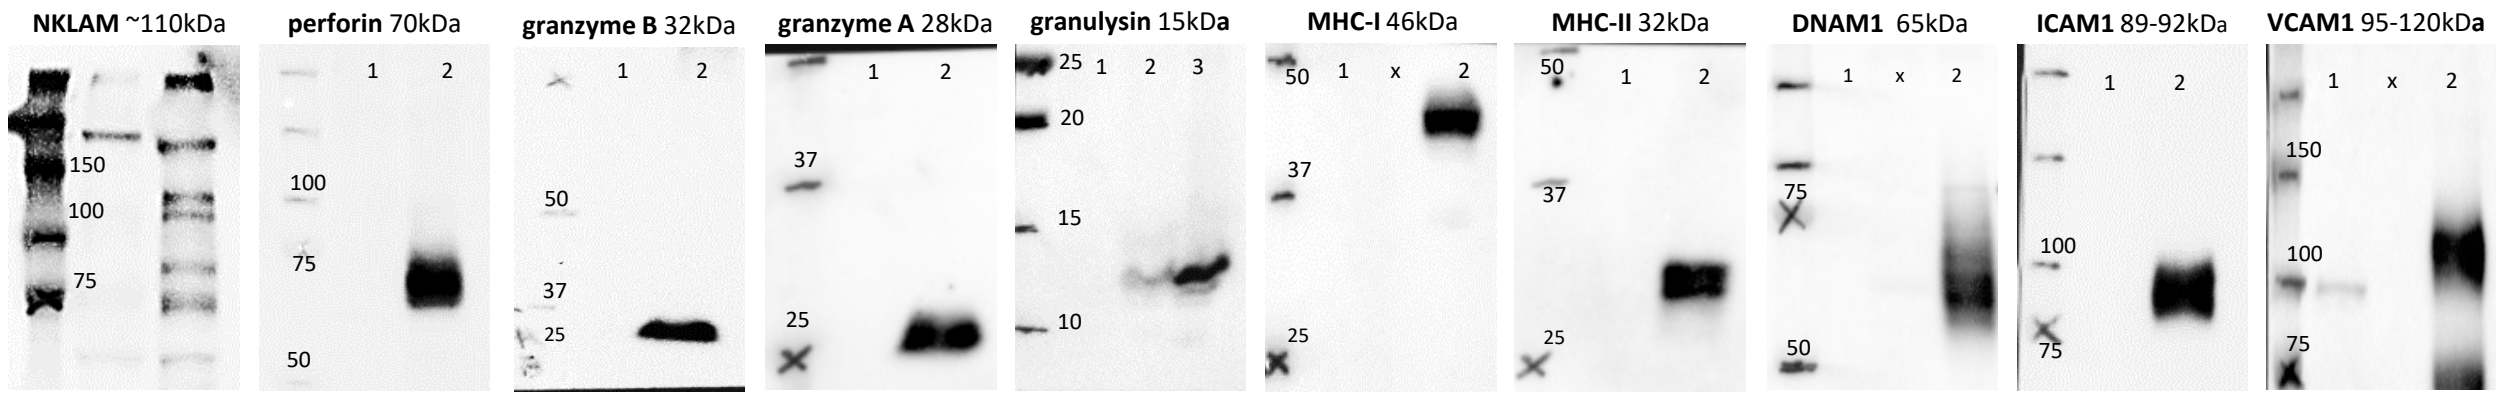

# Figure 3

20ug/lane

Lane 1: 0

Lane 2: +p

Lane 3: +p+s

## Cytoplasmic

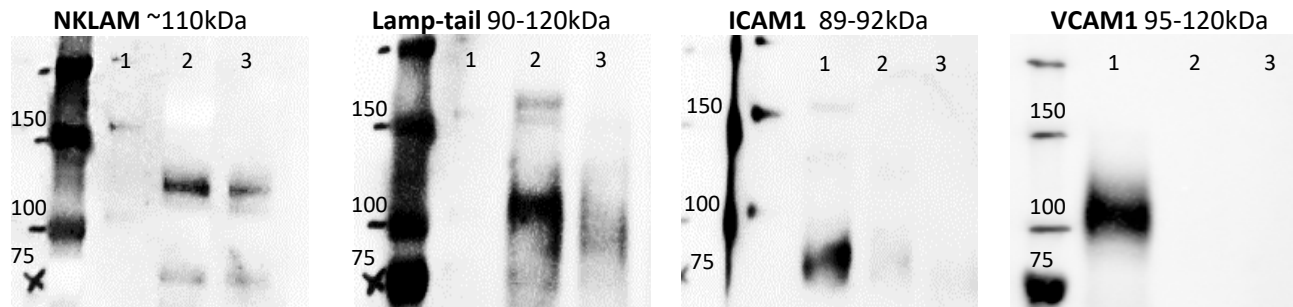

## Luminal

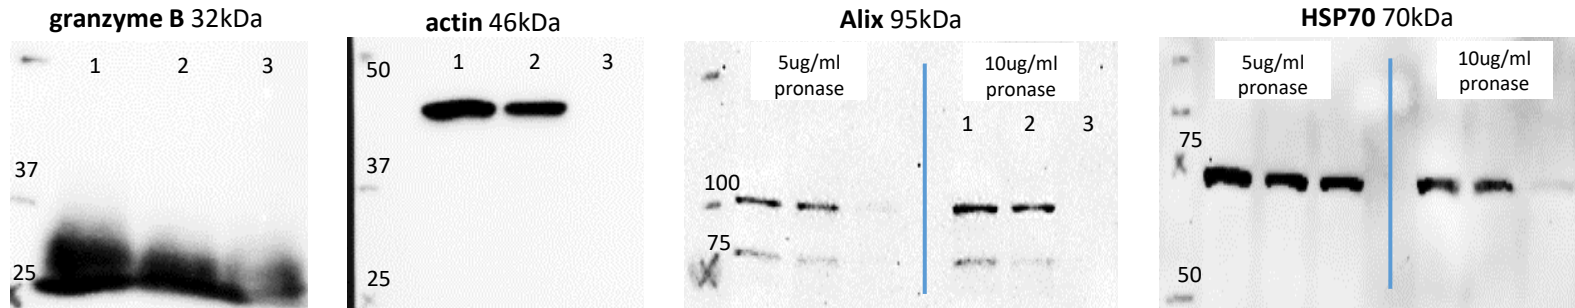

# Figure 6 (E)

25ug/lane

|        | PBS | St | NK EV |   |
|--------|-----|----|-------|---|
| Lanes: | 1   | 2  | 3     | 4 |

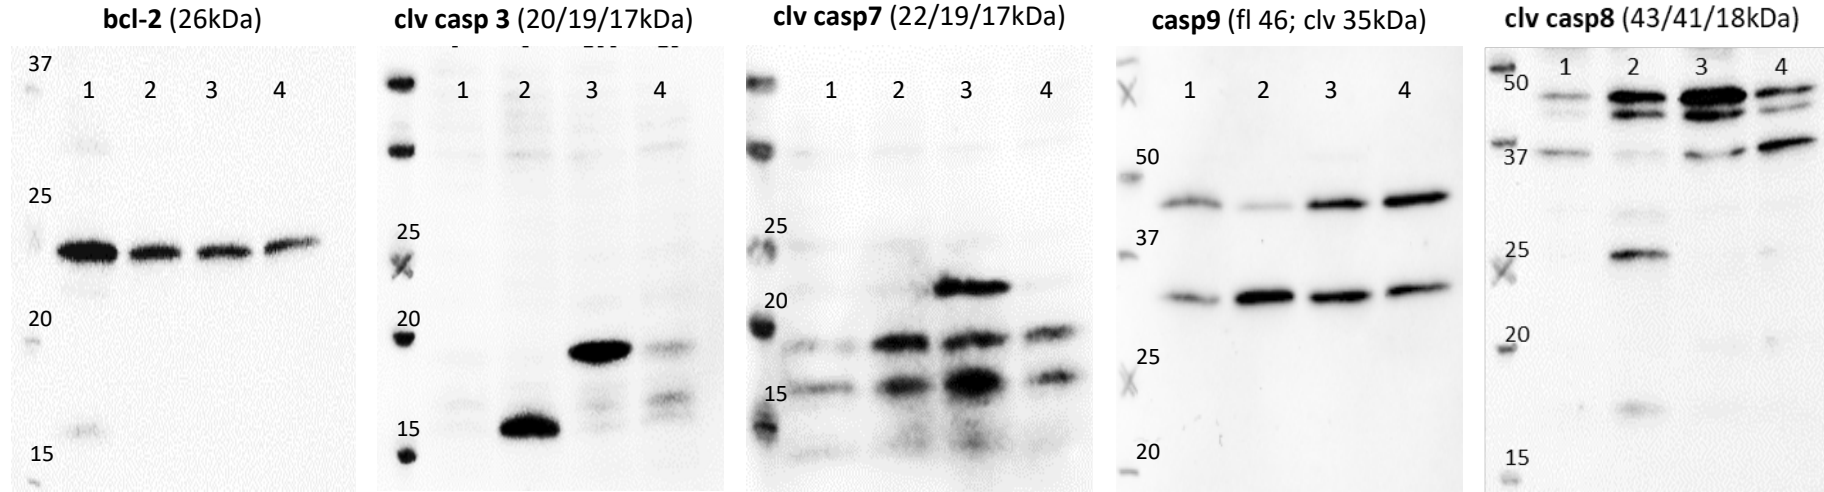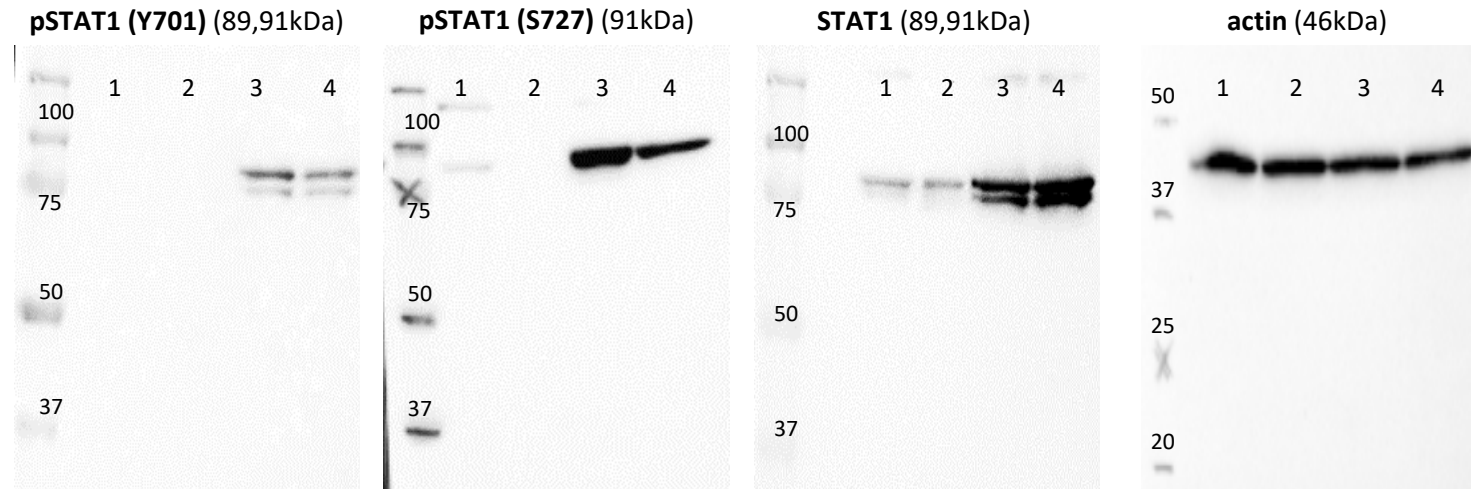

# Figure 6 (F)

20ug/lane

K562lys

3.3EV NK3.3lys (treated)

Lanes: 1 2 3

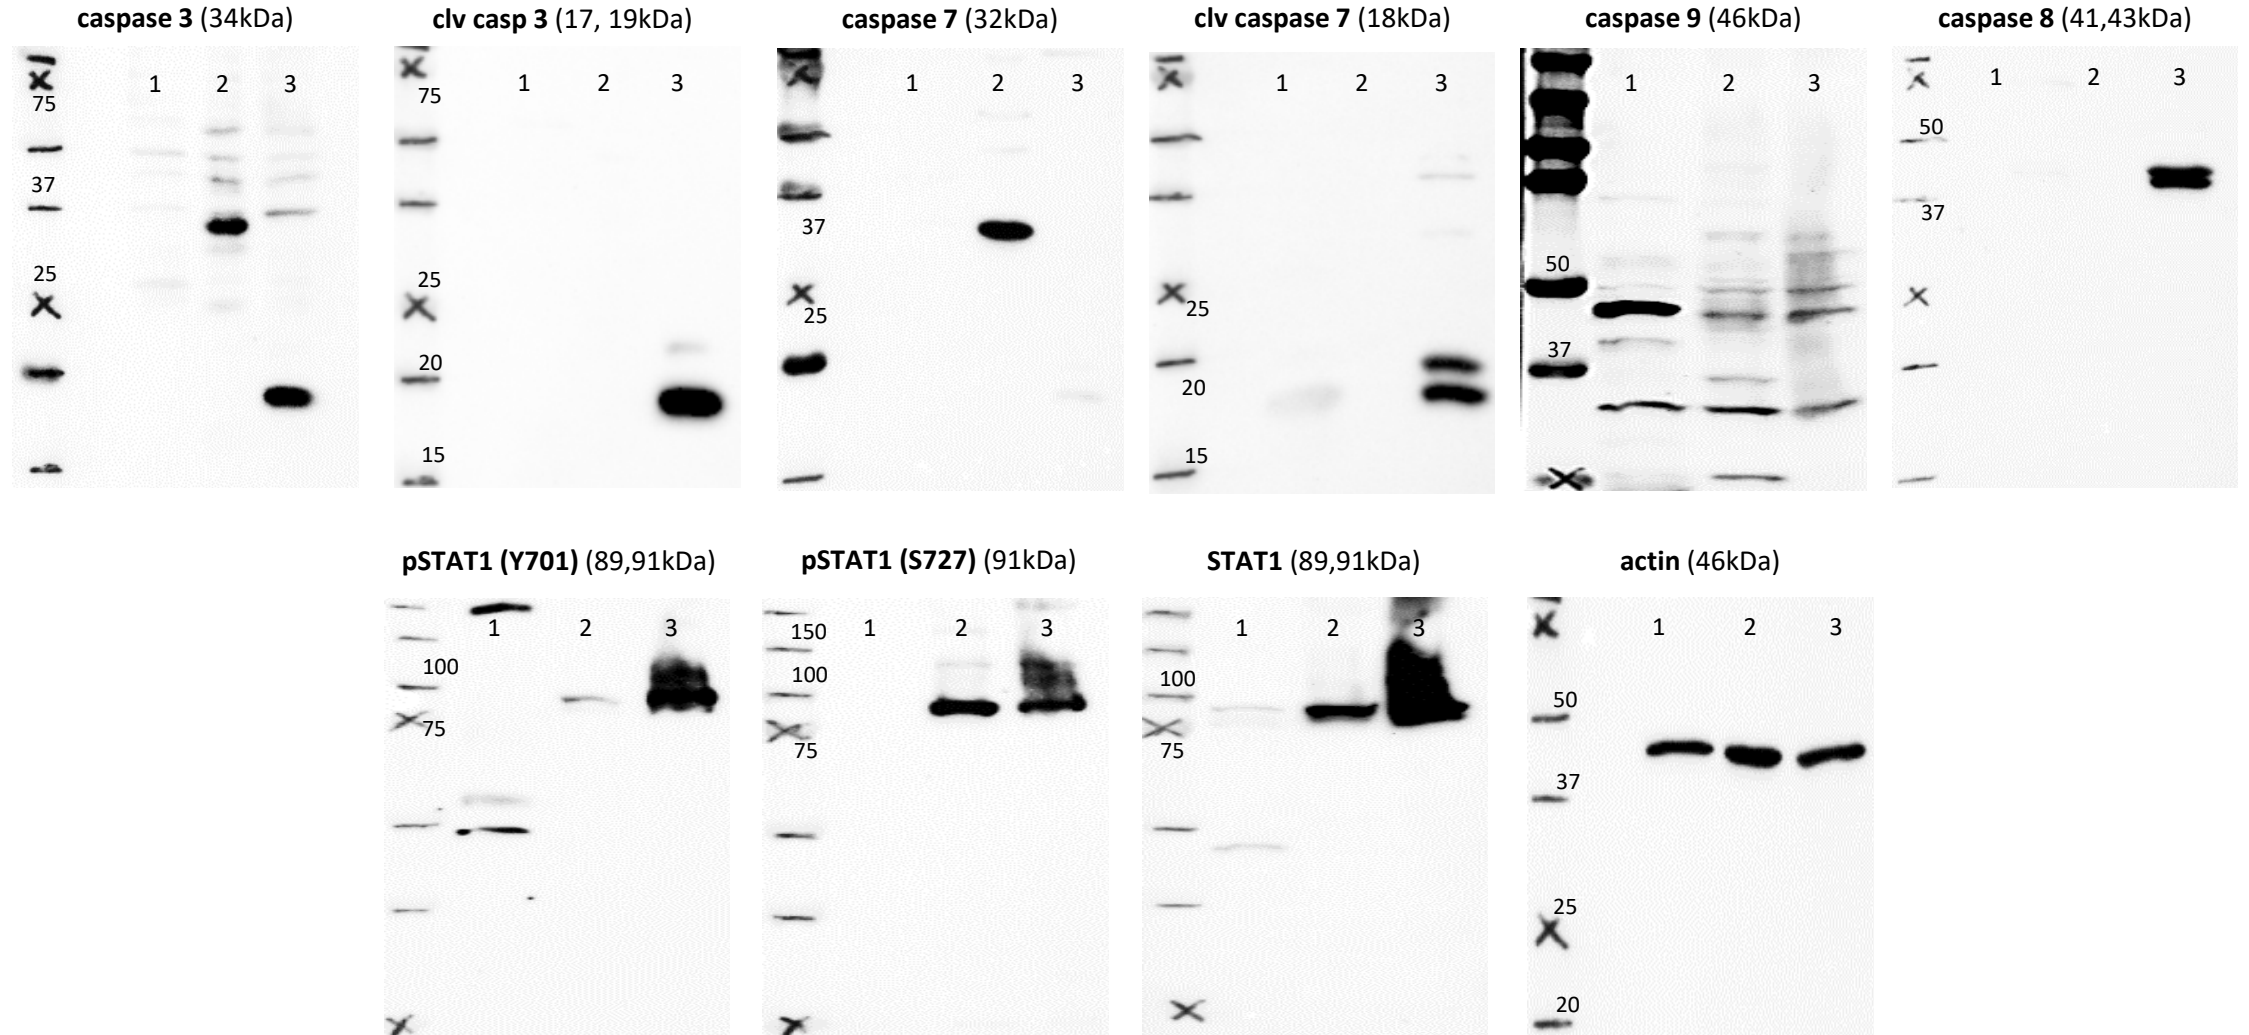

## Supplemental Figure 2

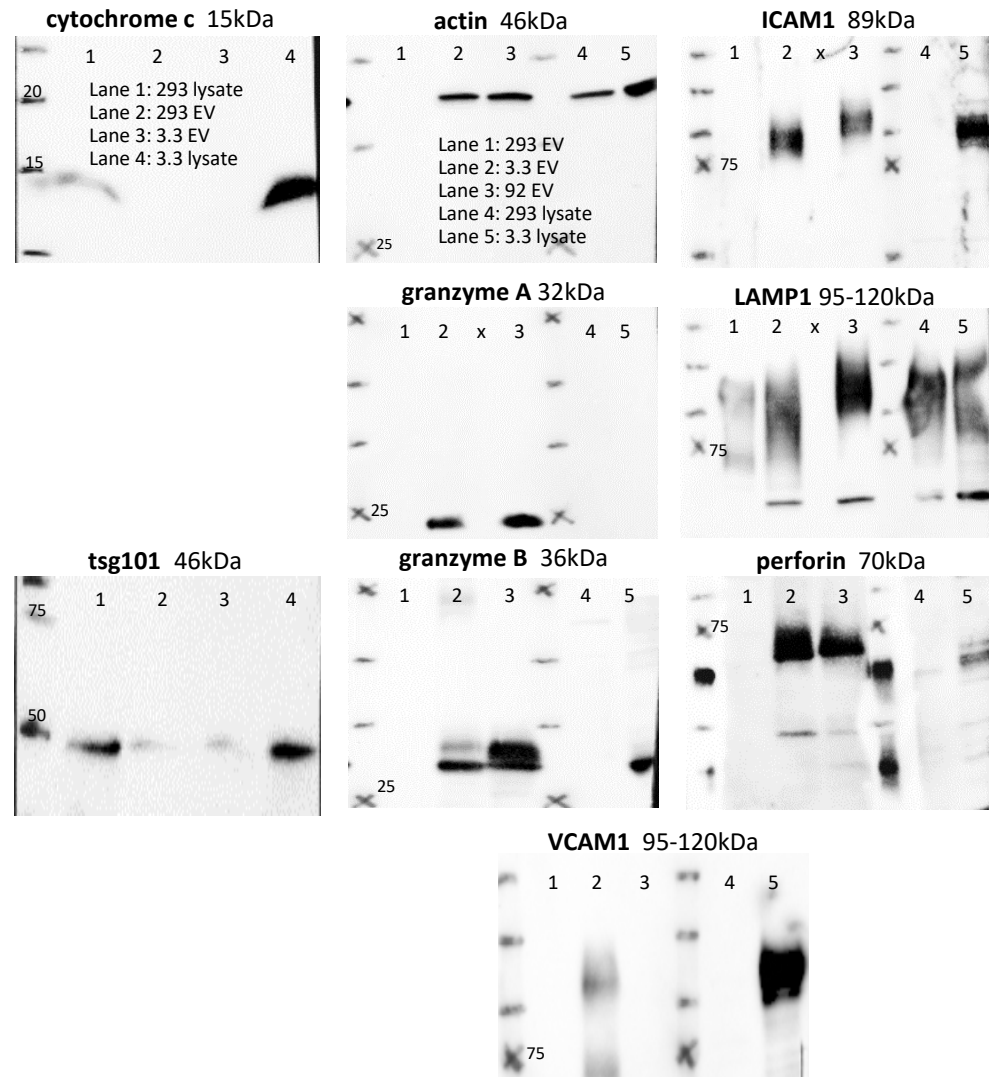

Supplement: Image_1.pdf [file Image_1.pdf]
