# Supplementary material for: Extracellular Vesicles From the Human Natural Killer Cell Line NK3.3 Have Broad and Potent Anti-Tumor Activity
Source: Front Cell Dev Biol. 2021 Jul 23;9:698639. doi: 10.3389/fcell.2021.698639 (PMC8343581; doi:10.3389/fcell.2021.698639)
Supplement: Supplementary file 3 [file Table_3.XLSX]

## Sheet: Sheet1
gene_id	chrom	start	stop	strand	Sample_NK3_3_1_replicate1	Sample_NK3_3_2_replicate1	type
RNA5-8S5	chrUn_gl000220	112025	156152	+	4119172	4119172	other_ncRNA
XLOC_014515	chrUn_gl000220	97129	126696	+	3208575	3208575	lincRNA
RNA45S5	chrUn_gl000220	105424	118780	+	3208541	3208541	other_ncRNA
hsa-mir-21	chr17	57918627	57918698	+	2723776	2723776	miRNA
hsa-miR-21-5p	chr17	57918634	57918655	+	2720200	2720200	miRNA
hsa-mir-155	chr21	26946292	26946356	+	1712651	1712651	miRNA
hsa-miR-155-5p	chr21	26946295	26946317	+	1712644	1712644	miRNA
RHOU:antisense	chr1	228780394	228882416	+	1076448	1076448	other_ncRNA_antisense
5S_copy43	chr1	228746013	228746133	-	1076276	1076276	rRNA
5S_copy44	chr1	228748254	228748374	-	1076276	1076276	rRNA
5S_copy45	chr1	228750495	228750615	-	1076276	1076276	rRNA
5S_copy46	chr1	228752736	228752856	-	1076276	1076276	rRNA
5S_copy47	chr1	228754977	228755097	-	1076276	1076276	rRNA
5S_copy48	chr1	228757192	228757312	-	1076276	1076276	rRNA
5S_copy49	chr1	228759412	228759532	-	1076276	1076276	rRNA
5S_copy50	chr1	228761654	228761774	-	1076276	1076276	rRNA
5S_copy52	chr1	228766135	228766255	-	1076276	1076276	rRNA
5S_copy53	chr1	228768376	228768496	-	1076276	1076276	rRNA
5S_copy54	chr1	228770616	228770736	-	1076276	1076276	rRNA
5S_copy55	chr1	228772841	228772961	-	1076276	1076276	rRNA
5S_copy56	chr1	228775082	228775202	-	1076276	1076276	rRNA
5S_copy59	chr1	228781785	228781905	-	1076276	1076276	rRNA
5S_copy57	chr1	228777313	228777433	-	1076275	1076275	rRNA
5S_copy58	chr1	228779554	228779674	-	1076275	1076275	rRNA
5S_copy51	chr1	228763893	228764013	-	1043055	1043055	rRNA
RNA5-8S5:copy2	chrUn_gl000220	155997	156152	+	910583	910583	other_ncRNA
LSU-rRNA_Hsa_copy221	chrUn_gl000220	116862	118417	+	821088	821088	rRNA
KIAA1467	chr12	13197315	13236383	+	703380	703380	RefSeq
5S_copy392	chr12	13199086	13199175	+	703367	703367	rRNA
NFYB1	chr12	104510858	104532040	-	703109	703109	RefSeq_antisense
MED12L	chr3	150804676	151154465	+	703100	703100	RefSeq
5S_copy409	chr12	104519014	104519103	+	703098	703098	rRNA
5S_copy457	chr14	107092677	107092766	+	702915	702915	rRNA
5S_copy132	chr3	150905886	150905971	+	702716	702716	rRNA
5S_copy138	chr3	179879675	179879765	-	702189	702189	rRNA
VAC14	chr16	70721342	70835061	-	654258	654258	RefSeq
NR6A11	chr9	127279554	127533589	-	654008	654008	RefSeq_antisense
VAC141	chr16	70721342	70835061	-	653820	653820	RefSeq_antisense
LSU-rRNA_Hsa_copy226	chrUn_gl000220	160834	161802	+	571497	571497	rRNA
hsa-mir-181a-1	chr1	198828173	198828282	-	489853	489853	miRNA
hsa-miR-181a-5p	chr1	198828237	198828259	-	485986	485986	miRNA
hsa-mir-181a-2	chr9	127454721	127454830	+	485986	485986	miRNA
LSU-rRNA_Hsa_copy219	chrUn_gl000220	114239	115498	+	437449	437449	rRNA
LSU-rRNA_Hsa_copy224	chrUn_gl000220	158211	159470	+	437449	437449	rRNA
LOC100129636:copy41	chr6	307442	29044517	+	426498	426498	RefSeq_antisense
LSU-rRNA_Hsa_copy220	chrUn_gl000220	115522	116829	+	387376	387376	rRNA
LSU-rRNA_Hsa_copy225	chrUn_gl000220	159494	160801	+	387376	387376	rRNA
LOC100129636:copy4	chr6	307442	29044517	+	371561	371561	RefSeq
SSU-rRNA_Hsa_copy34	chrUn_gl000220	109078	110946	+	368933	368933	rRNA
SSU-rRNA_Hsa_copy35	chrUn_gl000220	153050	154918	+	368933	368933	rRNA
5S_copy398	chr12	38555266	38555384	-	337842	337842	rRNA
chr17.tRNA5-GlyGCC	chr17	8029064	8029134	+	327484	327484	tRNA
chr1.tRNA68-GlyGCC	chr1	161493637	161493707	-	327420	327420	tRNA
chr16.tRNA24-GlyGCC	chr16	70812942	70813012	-	327351	327351	tRNA
chr16.tRNA19-GlyGCC	chr16	70823410	70823480	+	327338	327338	tRNA
chr6.tRNA128-GlyGCC	chr6	27870686	27870756	-	327321	327321	tRNA
chr2.tRNA19-GlyGCC	chr2	157257659	157257729	-	327091	327091	tRNA
chr16.tRNA25-GlyGCC	chr16	70812114	70812184	-	326868	326868	tRNA
tRNA-Gly-GGY_copy5	chr5	85668668	85668703	-	326483	326483	tRNA_like
chr16.tRNA18-GlyGCC	chr16	70822597	70822667	+	326436	326436	tRNA
COLQ1	chr3	15491640	15563258	-	303761	303761	RefSeq_antisense
chr1.tRNA133-GlyCCC	chr1	16872434	16872504	-	303704	303704	tRNA
chr1.tRNA4-GlyCCC	chr1	17188416	17188486	+	303704	303704	tRNA
tRNA-Gly-GGG_copy19	chr3	15549499	15549535	+	303703	303703	tRNA_like
EDA	chrX	68835911	69259321	+	299436	299436	RefSeq
5S_copy322	chrX	68892323	68892443	+	299162	299162	rRNA
IL1RAPL11	chrX	28605681	29974017	+	292708	292708	RefSeq_antisense
5S_copy314	chrX	29000967	29001087	-	290810	290810	rRNA
SLC37A3	chr7	140033552	140098311	-	290793	290793	RefSeq
5S_copy258	chr7	140086579	140086690	-	290725	290725	rRNA
ZNF7141	chr19	21264953	21307883	+	290687	290687	RefSeq_antisense
5S_copy522	chr19	21295932	21296041	-	290663	290663	rRNA
5S_copy397	chr12	34358634	34358754	+	286542	286542	rRNA
LSU-rRNA_Hsa_copy217	chrUn_gl000220	113348	114110	+	279777	279777	rRNA
LSU-rRNA_Hsa_copy222	chrUn_gl000220	157320	158082	+	279777	279777	rRNA
TEX2641	chr3	51705191	51738339	+	276386	276386	RefSeq_antisense
5S_copy116	chr3	51728479	51728598	-	276377	276377	rRNA
linc-S100B-2:antisense	chr21	9826394	9827720	-	255527	255527	lincRNA_antisense
SSU-rRNA_Hsa_copy32	chr21	9827005	9827578	+	255496	255496	rRNA
U2:RF00004.39	chr6	89773219	89773409	-	239493	239493	rfam
U2:RF00004.22	chr3	127793916	127794092	-	239339	239339	rfam
IFT88	chr13	21141208	21265576	+	236833	236833	RefSeq
GSKIP	chr14	96829789	96853627	+	236234	236234	RefSeq
U2:RF00004.71	chr14	96850961	96851152	+	236221	236221	rfam
U2:RF00004.35	chr5	157403774	157403964	-	236216	236216	rfam
U2:RF00004.66	chr13	21186300	21186477	+	236162	236162	rfam
5S_copy198	chr6	4428197	4428316	+	214762	214762	rRNA
HFM1	chr1	91726323	91870426	-	194395	194395	RefSeq
LSU-rRNA_Hsa_copy8	chr1	91852786	91853147	-	194250	194250	rRNA
LSU-rRNA_Hsa_copy121	chrX	108297349	108297830	+	181701	181701	rRNA
KIAA0226L	chr13	46916137	46961635	-	180901	180901	RefSeq
U2:RF00004.67	chr13	46948536	46948725	-	180871	180871	rfam
piR-30113	chrM	4443	4470	+	172530	172530	piRNA
hsa-miR-181b-5p	chr1	198828054	198828076	-	167772	167772	miRNA
hsa-mir-181b-2	chr9	127455989	127456077	+	167772	167772	miRNA
Y_RNA:RF00019.402	chr7	148660407	148660502	+	152238	152238	rfam
hsa-mir-181b-1	chr1	198828002	198828111	-	152186	152186	miRNA
5S_copy478	chr16	50903365	50903478	-	145148	145148	rRNA
linc-CCND1-3	chr11	69229075	69231600	+	143730	143730	lincRNA
hsa-mir-92a-1	chr13	92003568	92003645	+	139438	139438	miRNA
5S_copy519	chr19	7951861	7951980	-	132320	132320	rRNA
hsa-miR-92a-3p	chr13	92003615	92003636	+	131981	131981	miRNA
hsa-mir-92a-2	chrX	133303568	133303642	-	131981	131981	miRNA
ERICH1-AS1	chr8	687587	1087777	+	128280	128280	other_ncRNA
hsa-mir-146b	chr10	104196269	104196341	+	127894	127894	miRNA
UNC45B1	chr17	33474836	33516364	+	127598	127598	RefSeq_antisense
hsa-miR-146b-5p	chr10	104196277	104196298	+	127500	127500	miRNA
LSU-rRNA_Hsa_copy179	chr17	33478115	33478275	-	125648	125648	rRNA
RXRB1	chr6_qbl_hap6	4393584	4400696	-	122646	122646	RefSeq_antisense
RXRB:copy21	chr6_dbb_hap3	4442669	4449780	-	122646	122646	RefSeq_antisense
RXRB:copy31	chr6_cox_hap2	4605198	4612307	-	122646	122646	RefSeq_antisense
RXRB:copy41	chr6_mann_hap4	4618677	4625789	-	122646	122646	RefSeq_antisense
RXRB:copy51	chr6_mcf_hap5	4635126	4642234	-	122646	122646	RefSeq_antisense
RXRB:copy61	chr6	33161362	33168473	-	122646	122646	RefSeq_antisense
Y_RNA:RF00019.317	chr6	33167378	33167473	+	122646	122646	rfam
5S_copy139	chr3	181540659	181540778	-	121358	121358	rRNA
5S_copy128	chr3	134502308	134502397	-	120951	120951	rRNA
HUWE1	chrX	53559057	53713697	-	120699	120699	RefSeq
CCNL11	chr3	156865586	156878482	-	120372	120372	RefSeq_antisense
Y_RNA:RF00019.196	chr3	156871337	156871429	+	120370	120370	rfam
SLCO5A1	chr8	70584568	70747299	-	119657	119657	RefSeq
LSU-rRNA_Hsa_copy106	chr8	70602249	70602620	-	119025	119025	rRNA
CTDSP1	chr2	219263061	219270664	+	116332	116332	RefSeq
hsa-mir-26b	chr2	219267369	219267445	+	116328	116328	miRNA
hsa-miR-26b-5p	chr2	219267380	219267400	+	116318	116318	miRNA
HINT31	chr6	126277861	126301389	+	113241	113241	RefSeq_antisense
5S_copy218	chr6	126301022	126301080	-	113240	113240	rRNA
PCDH11X	chrX	91034260	91139006	+	109962	109962	RefSeq
PCDH11Y	chrY	4868267	4973639	+	109944	109944	RefSeq
U2:RF00004.89	chrX	91053092	91053282	+	109884	109884	rfam
U2:RF00004.91	chrY	4887117	4887307	+	109884	109884	rfam
CA81	chr8	61101423	61193954	-	106961	106961	RefSeq_antisense
WDR33	chr2	128461808	128568761	-	102549	102549	RefSeq
WDR33:copy2	chr2	128492954	128568761	-	102466	102466	RefSeq
WDR33:copy3	chr2	128520060	128568761	-	102448	102448	RefSeq
Y_RNA:RF00019.116	chr2	128556477	128556572	-	102369	102369	rfam
STX111	chr6	144471654	144513076	+	91874	91874	RefSeq_antisense
hsa-let-7f-2	chrX	53584153	53584235	-	85063	85063	miRNA
let-7:RF00027.14	chrX	53584154	53584234	-	85063	85063	rfam
hsa-let-7f-5p	chr9	96938635	96938656	+	84891	84891	miRNA
hsa-let-7i	chr12	62997466	62997549	+	83905	83905	miRNA
let-7:RF00027.7	chr12	62997465	62997551	+	83905	83905	rfam
hsa-let-7i-5p	chr12	62997471	62997492	+	83864	83864	miRNA
hsa-let-7f-1	chr9	96938629	96938715	+	83238	83238	miRNA
let-7:RF00027.4	chr9	96938629	96938715	+	83238	83238	rfam
piR-49143	chr9	96938635	96938666	+	83174	83174	piRNA
MCM7	chr7	99690351	99699563	-	75180	75180	RefSeq
DLEU2	chr13	50556688	50699677	-	75066	75066	other_ncRNA
2018-03-12	chr4	164445450	165304407	-	74728	74728	RefSeq_antisense
RYR2	chr1	237205702	237997288	+	72024	72024	RefSeq
LSU-rRNA_Hsa_copy19	chr1	237766309	237766764	+	71656	71656	rRNA
SMC4	chr3	160117430	160152741	+	71642	71642	RefSeq
PANK2	chr20	3869486	3904502	+	70972	70972	RefSeq
hsa-mir-103a-2	chr20	3898141	3898218	+	70936	70936	miRNA
PANK3	chr5	167982628	168006614	-	70851	70851	RefSeq
hsa-mir-103a-1	chr5	167987901	167987978	-	70831	70831	miRNA
hsa-miR-103a-3p	chr20	3898188	3898210	+	70812	70812	miRNA
hsa-mir-146a	chr5	159912359	159912457	+	70163	70163	miRNA
hsa-miR-146a-5p	chr5	159912379	159912400	+	69912	69912	miRNA
hsa-mir-16-2	chr3	160122533	160122613	+	68372	68372	miRNA
KIF26B1	chr1	245318287	245866428	+	67880	67880	RefSeq_antisense
hsa-mir-16-1	chr13	50623109	50623197	-	67857	67857	miRNA
hsa-miR-16-5p	chr13	50623163	50623184	-	67442	67442	miRNA
U2:RF00004.61	chr11	62609091	62609281	-	67074	67074	rfam
ANKRD30BL	chr2	132905164	133015542	-	66621	66621	other_ncRNA
SSU_rRNA_eukarya:RF01960.1	chr2	133011928	133013768	-	66484	66484	rfam
SSU-rRNA_Hsa_copy4	chr2	133011920	133013768	-	66484	66484	rRNA
U2:RF00004.51	chr9	89037853	89038043	-	66135	66135	rfam
U1:RF00003.109	chr14	35015920	35016083	+	64904	64904	rfam
U1:RF00003.110	chr14	35025432	35025595	-	64904	64904	rfam
U1:RF00003.38	chr1	149224058	149224221	-	64874	64874	rfam
U1:RF00003.3	chr1	16840617	16840780	-	64859	64859	rfam
U1:RF00003.5	chr1	16993280	16993443	-	64859	64859	rfam
U1:RF00003.6	chr1	17067011	17067174	+	64859	64859	rfam
U1:RF00003.8	chr1	17222475	17222638	+	64859	64859	rfam
INTS41	chr11	77589766	77705717	-	63921	63921	RefSeq_antisense
LSU-rRNA_Hsa_copy143	chr11	77597474	77597831	+	63850	63850	rRNA
CTDSP2	chr12	58213710	58240747	-	62861	62861	RefSeq
hsa-mir-26a-2	chr12	58218392	58218475	-	62838	62838	miRNA
CTDSPL	chr3	37903669	38025960	+	62809	62809	RefSeq
BZRAP1-AS1:antisense	chr17	56402811	56431088	+	62785	62785	other_ncRNA_antisense
hsa-mir-142	chr17	56408593	56408679	-	62754	62754	miRNA
hsa-mir-26a-1	chr3	38010895	38010971	+	62737	62737	miRNA
hsa-miR-26a-5p	chr12	58218441	58218462	-	62724	62724	miRNA
Y_RNA:RF00019.401	chr7	148638580	148638658	+	62455	62455	rfam
NBPF24:copy21	chr1	147574323	148346929	-	61092	61092	RefSeq_antisense
hsa-miR-1246	chr2	177465752	177465770	-	53401	53401	miRNA
hsa-mir-1246	chr2	177465708	177465780	-	53401	53401	miRNA
LOC1002881421	chr1	144146811	146467744	+	53301	53301	RefSeq_antisense
NBPF101	chr1	145293371	146466121	+	52770	52770	RefSeq_antisense
chr1.tRNA35-GlyGCC	chr1	161413094	161413164	+	52646	52646	tRNA
chr1.tRNA37-GlyGCC	chr1	161420467	161420537	+	52646	52646	tRNA
chr1.tRNA39-GlyGCC	chr1	161427898	161427968	+	52646	52646	tRNA
chr1.tRNA41-GlyGCC	chr1	161435258	161435328	+	52646	52646	tRNA
chr21.tRNA2-GlyGCC	chr21	18827107	18827177	-	52645	52645	tRNA
LSU-rRNA_Hsa_copy20	chr2	133036251	133039236	-	50066	50066	rRNA
LSU-rRNA_Hsa_copy162	chr12	127650453	127650987	-	49833	49833	rRNA
5S_copy41	chr1	227748882	227749003	+	49705	49705	rRNA
FANCC	chr9	97861336	98079991	-	49430	49430	RefSeq
FANCC:copy2	chr9	97872508	98079991	-	49427	49427	RefSeq
5S_copy108	chr3	14436148	14436259	+	49352	49352	rRNA
5S_copy301	chr9	97904729	97904823	-	49231	49231	rRNA
NBPF24:copy2	chr1	147574323	148346929	-	48254	48254	RefSeq
hsa-miR-142-5p	chr17	56408644	56408664	-	46067	46067	miRNA
GAS5	chr1	173833039	173837125	-	45047	45047	other_ncRNA
5_8S_rRNA:RF00002.6	chrY	10037764	10037915	+	41252	41252	rfam
TEX14	chr17	56634038	56769416	-	38540	38540	RefSeq
hsa-let-7a-2	chr11	122017230	122017301	-	38270	38270	miRNA
let-7:RF00027.6	chr11	122017228	122017303	-	38270	38270	rfam
hsa-let-7a-1	chr9	96938239	96938318	+	38136	38136	miRNA
let-7:RF00027.3	chr9	96938238	96938319	+	38136	38136	rfam
hsa-let-7a-3	chr22	46508629	46508702	+	38109	38109	miRNA
let-7:RF00027.11	chr22	46508626	46508704	+	38109	38109	rfam
piR-49144	chr9	96938244	96938273	+	38051	38051	piRNA
hsa-let-7a-5p	chr11	122017276	122017297	-	38047	38047	miRNA
piR-32678	chrUn_gl000220	112106	112135	+	38040	38040	piRNA
SNHG1	chr11	62619460	62623360	-	36957	36957	other_ncRNA
U1:RF00003.20	chr1	145969270	145969433	-	36828	36828	rfam
U1:RF00003.24	chr1	147511004	147511167	-	36828	36828	rfam
SSU_rRNA_eukarya:RF01960.2	chr16	33962497	33964357	+	36015	36015	rfam
SSU-rRNA_Hsa_copy31	chr16	33962497	33964361	+	36015	36015	rRNA
U1:RF00003.11	chr1	143647014	143647177	-	35653	35653	rfam
U1:RF00003.27	chr1	147834502	147834665	-	35653	35653	rfam
hsa-mir-98	chrX	53583184	53583302	-	35466	35466	miRNA
let-7:RF00027.13	chrX	53583199	53583287	-	35466	35466	rfam
hsa-miR-98-5p	chrX	53583260	53583281	-	35414	35414	miRNA
U1:RF00003.40	chr1	149514090	149514256	-	35265	35265	rfam
WDR82	chr3	52288438	52312659	-	34643	34643	RefSeq
hsa-let-7g	chr3	52302294	52302377	-	34611	34611	miRNA
let-7:RF00027.2	chr3	52302292	52302379	-	34611	34611	rfam
hsa-let-7g-5p	chr3	52302352	52302373	-	34537	34537	miRNA
COPZ1	chr12	54718874	54745635	+	34169	34169	other_ncRNA
hsa-mir-148b	chr12	54731000	54731098	+	34134	34134	miRNA
PHACTR1	chr6	12717037	13288075	+	34039	34039	RefSeq
hsa-miR-148b-3p	chr12	54731062	54731083	+	33833	33833	miRNA
FLJ45974:antisense	chr7	53723202	53879624	-	33758	33758	other_ncRNA_antisense
U2:RF00004.42	chr7	53843829	53844017	+	33665	33665	rfam
U1:RF00003.73	chr6	13214288	13214451	+	33636	33636	rfam
Y_RNA:RF00019.404	chr7	148684228	148684340	-	33537	33537	rfam
DALRD3	chr3	49052921	49058504	-	33030	33030	RefSeq
hsa-miR-19b-3p	chr13	92003499	92003521	+	32787	32787	miRNA
hsa-mir-19b-2	chrX	133303701	133303796	-	32787	32787	miRNA
hsa-mir-19b-1	chr13	92003446	92003532	+	32682	32682	miRNA
hsa-mir-25	chr7	99691183	99691266	-	30251	30251	miRNA
hsa-miR-25-3p	chr7	99691194	99691215	-	30239	30239	miRNA
AFF21	chrX	147582139	148082193	+	30203	30203	RefSeq_antisense
RNLS	chr10	90033621	90343082	-	29809	29809	RefSeq
RNLS:copy2	chr10	90043859	90343082	-	29805	29805	RefSeq
U1:RF00003.62	chr4	136917084	136917247	-	29686	29686	rfam
U1:RF00003.31	chr1	147994146	147994313	+	29341	29341	rfam
U1:RF00003.116	chr16	3136144	3136301	+	28961	28961	rfam
DCUN1D2	chr13	114110134	114145023	-	28937	28937	RefSeq
U1:RF00003.107	chr13	114133230	114133393	-	28930	28930	rfam
hsa-mir-93	chr7	99691391	99691470	-	28873	28873	miRNA
U1:RF00003.45	chr1	245297229	245297392	-	28824	28824	rfam
hsa-miR-93-5p	chr7	99691438	99691460	-	28787	28787	miRNA
NFYC	chr1	41157242	41237275	+	28760	28760	RefSeq
NFYC:copy2	chr1	41157680	41237275	+	28760	28760	RefSeq
U1:RF00003.126	chr18	48810103	48810266	-	28712	28712	rfam
TMEM161B	chr5	87491023	87564665	-	27961	27961	RefSeq
PID1	chr2	229888689	230136057	-	27890	27890	RefSeq
SKA2	chr17	57187308	57232800	-	27464	27464	RefSeq
DPP10	chr2	115199899	116602326	+	27188	27188	RefSeq
DPP10:copy2	chr2	115219180	116602326	+	27181	27181	RefSeq
LSU-rRNA_Hsa_copy38	chr2	230045488	230045638	-	26895	26895	rRNA
U1:RF00003.61	chr4	114341479	114341642	+	26534	26534	rfam
LSU-rRNA_Hsa_copy89	chr7	68527371	68527788	+	26491	26491	rRNA
U1:RF00003.100	chr12	19877369	19877533	+	26215	26215	rfam
U1:RF00003.57	chr3	192447344	192447505	-	26210	26210	rfam
U1:RF00003.95	chr10	85763088	85763235	+	26204	26204	rfam
U1:RF00003.25	chr1	147735751	147735907	+	26123	26123	rfam
FOXP4	chr6	41514164	41570122	+	25397	25397	RefSeq
CDK11B1	chr1	1571100	1655775	-	25321	25321	RefSeq_antisense
SLC35E2B1	chr1	1592939	1624243	-	25284	25284	RefSeq_antisense
FILIP1	chr6	76017800	76203496	-	25074	25074	RefSeq
U1:RF00003.90	chr8	23934510	23934671	-	25057	25057	rfam
U1:RF00003.46	chr2	60611740	60611898	+	25034	25034	rfam
U1:RF00003.81	chr6	76183454	76183610	-	24996	24996	rfam
FHIT	chr3	59735036	61237133	-	24613	24613	RefSeq
TTLL111	chr9	124584204	124855885	-	24470	24470	RefSeq_antisense
hsa-mir-30e	chr1	41220027	41220118	+	24276	24276	miRNA
LSU-rRNA_Hsa_copy112	chr9	79186649	79186950	+	23928	23928	rRNA
U1:RF00003.123	chr17	56756888	56757051	-	23901	23901	rfam
hsa-mir-20a	chr13	92003319	92003389	+	23852	23852	miRNA
hsa-miR-20a-5p	chr13	92003326	92003348	+	23757	23757	miRNA
hsa-mir-17	chr13	92002859	92002942	+	23545	23545	miRNA
MIER11	chr1	67390578	67454302	+	22965	22965	RefSeq_antisense
Y_RNA:RF00019.812	chr20	18309650	18309746	+	22958	22958	rfam
MIER1:copy21	chr1	67395926	67454302	+	22957	22957	RefSeq_antisense
hsa-miR-17-5p	chr13	92002872	92002894	+	22633	22633	miRNA
SSU-rRNA_Hsa_copy36	chrUn_gl000229	18171	19913	+	22563	22563	rRNA
RCL1	chr9	4792834	4861064	+	22336	22336	RefSeq
NPAS3	chr14	33408459	34273382	+	22322	22322	RefSeq
hsa-miR-101-3p	chr1	65524125	65524145	-	22307	22307	miRNA
hsa-mir-101-2	chr9	4850297	4850375	+	22307	22307	miRNA
DLG21	chr11	83166056	85338314	-	22154	22154	RefSeq_antisense
hsa-mir-101-1	chr1	65524117	65524191	-	22034	22034	miRNA
5S_copy499	chr17	39874406	39874495	+	22032	22032	rRNA
hsa-mir-221	chrX	45605585	45605694	-	21932	21932	miRNA
hsa-miR-221-3p	chrX	45605608	45605630	-	21902	21902	miRNA
EIF4A2	chr3	186501361	186507685	+	21666	21666	RefSeq
PANK1	chr10	91339254	91405329	-	21506	21506	RefSeq
hsa-mir-107	chr10	91352504	91352584	-	21435	21435	miRNA
NDUFAF31	chr3	49057908	49060926	+	21427	21427	RefSeq_antisense
hsa-mir-191	chr3	49058051	49058142	-	21426	21426	miRNA
hsa-miR-107	chr10	91352513	91352535	-	21419	21419	miRNA
hsa-miR-191-5p	chr3	49058105	49058127	-	21402	21402	miRNA
snR39B	chr3	186502585	186502654	+	21273	21273	CDBox
SLC9A9	chr3	142984064	143567373	-	21250	21250	RefSeq
ZRANB2	chr1	71528974	71546972	-	21183	21183	RefSeq
hsa-mir-186	chr1	71533314	71533399	-	21179	21179	miRNA
hsa-miR-186-5p	chr1	71533364	71533385	-	21168	21168	miRNA
LSU-rRNA_Hsa_copy216	chrUn_gl000220	95615	96145	+	21152	21152	rRNA
LSU-rRNA_Hsa_copy145	chr11	85195012	85195307	+	21104	21104	rRNA
MACROD21	chr20	13976146	16033841	+	21000	21000	RefSeq_antisense
hsa-mir-196a-2	chr12	54385522	54385631	+	20858	20858	miRNA
hsa-mir-23a	chr19	13947401	13947473	-	20741	20741	miRNA
hsa-miR-23a-3p	chr19	13947409	13947429	-	20740	20740	miRNA
LIG3	chr17	33307517	33332088	+	20582	20582	RefSeq
LINC00338:antisense	chr17	75084725	75213181	+	20415	20415	other_ncRNA_antisense
SEC14L11	chr17	75137005	75213181	+	20375	20375	RefSeq_antisense
LSU-rRNA_Hsa_copy183	chr17	75158032	75158389	-	20288	20288	rRNA
STAT31	chr17	40465343	40540513	-	20031	20031	RefSeq_antisense
chr5.tRNA6-ValCAC	chr5	180600650	180600722	+	19964	19964	tRNA
DPYD	chr1	97543300	98386615	-	19894	19894	RefSeq
chr6.tRNA9-ValCAC	chr6	26538282	26538354	+	19757	19757	tRNA
chr5.tRNA10-ValCAC	chr5	180649395	180649467	-	19755	19755	tRNA
chr1.tRNA85-ValCAC	chr1	161369490	161369562	-	19658	19658	tRNA
chr5.tRNA18-ValCAC	chr5	180529253	180529325	-	19652	19652	tRNA
chr5.tRNA2-ValCAC	chr5	180524070	180524142	+	19652	19652	tRNA
chr1.tRNA98-ValCAC	chr1	149298555	149298627	-	19583	19583	tRNA
DPYD-AS1:antisense	chr1	97561479	97788511	+	19511	19511	other_ncRNA_antisense
LINC00461	chr5	87836597	87980620	-	19413	19413	other_ncRNA
LINC00461:copy2	chr5	87960263	87974262	-	19382	19382	other_ncRNA
POGZ1	chr1	151375200	151431941	-	19379	19379	RefSeq_antisense
Y_RNA:RF00019.48	chr1	151411476	151411571	+	19334	19334	rfam
chr1.tRNA90-ValCAC	chr1	149684088	149684161	-	19299	19299	tRNA
ADK	chr10	75910943	76469061	+	19287	19287	RefSeq
C1orf61	chr1	156374055	156399184	-	19254	19254	RefSeq
ADK:copy2	chr10	75936247	76469061	+	19247	19247	RefSeq
hsa-mir-9-2	chr5	87962671	87962757	-	19245	19245	miRNA
hsa-mir-9-1	chr1	156390133	156390221	-	19243	19243	miRNA
hsa-mir-9-3	chr15	89911248	89911337	+	19234	19234	miRNA
tRNA-Val-GTG_copy14	chr11	44784467	44784503	-	19206	19206	tRNA_like
U81	chr1	173833284	173833360	-	19095	19095	CDBox
tRNA-Val-GTY_copy4	chr2	47507895	47507932	-	19064	19064	tRNA_like
ZBTB201	chr3	114056947	114866127	-	19053	19053	RefSeq_antisense
HDAC4	chr2	239969864	240322643	-	18991	18991	RefSeq
hsa-miR-30e-3p	chr1	41220085	41220106	+	18834	18834	miRNA
DIP2C	chr10	320130	735608	-	18794	18794	RefSeq
hsa-mir-301a	chr17	57228497	57228582	-	18722	18722	miRNA
hsa-miR-9-5p	chr1	156390184	156390206	-	18674	18674	miRNA
SPAG6	chr10	22634374	22706539	+	18661	18661	RefSeq
hsa-miR-301a-3p	chr17	57228510	57228532	-	18655	18655	miRNA
U30	chr11	62621135	62621204	-	18640	18640	CDBox
hsa-mir-34a	chr1	9211727	9211836	-	18634	18634	miRNA
EYS	chr6	64429876	66417118	-	18563	18563	RefSeq
piR-58469	chrM	12168	12198	+	18556	18556	piRNA
5S_copy345	chr10	327976	328065	-	18545	18545	rRNA
U1:RF00003.36	chr1	149194106	149194269	-	18541	18541	rfam
piR-47305	chrM	12170	12201	+	18529	18529	piRNA
hsa-miR-34a-5p	chr1	9211794	9211815	-	18427	18427	miRNA
EVL	chr14	100531751	100610573	+	18427	18427	RefSeq
CDH1	chr16	68771195	68869444	+	18412	18412	RefSeq
hsa-mir-342	chr14	100575992	100576090	+	18365	18365	miRNA
CNTN4	chr3	2140550	3099645	+	18261	18261	RefSeq
CNTN4:copy2	chr3	2280513	3099645	+	18105	18105	RefSeq
TRAF31	chr14	103243816	103377837	+	17833	17833	RefSeq_antisense
hsa-mir-196a-1	chr17	46709852	46709921	-	17814	17814	miRNA
hsa-miR-196a-5p	chr12	54385546	54385567	+	17774	17774	miRNA
hsa-miR-342-3p	chr14	100576052	100576074	+	17701	17701	miRNA
PDE3A	chr12	20522179	20837041	+	17666	17666	RefSeq
CNTN4:copy3	chr3	2933899	3099645	+	17661	17661	RefSeq
SSU-rRNA_Hsa_copy25	chr12	20704358	20704522	+	17558	17558	rRNA
5_8S_rRNA:RF00002.3	chr16	33965426	33965577	+	17493	17493	rfam
U7:RF00066.141	chr12	7052979	7053041	+	17491	17491	rfam
5S_copy482	chr16	68776382	68776476	+	17379	17379	rRNA
NELL11	chr11	20691117	21597229	+	17294	17294	RefSeq_antisense
Y_RNA:RF00019.434	chr8	124056957	124057052	+	17127	17127	rfam
chr3.tRNA2-ValAAC	chr3	169490018	169490090	+	17067	17067	tRNA
C9orf3	chr9	97488951	97849500	+	17064	17064	RefSeq
C9orf3:copy2	chr9	97521931	97849500	+	17047	17047	RefSeq
chr5.tRNA4-ValAAC	chr5	180591154	180591226	+	17038	17038	tRNA
chr6.tRNA132-ValAAC	chr6	27721179	27721251	-	17006	17006	tRNA
chr5.tRNA5-ValAAC	chr5	180596610	180596682	+	17003	17003	tRNA
chr5.tRNA12-ValAAC	chr5	180645270	180645342	-	17001	17001	tRNA
LSU-rRNA_Hsa_copy69	chr5	71146745	71146942	+	16982	16982	rRNA
chr6.tRNA136-ValAAC	chr6	27648885	27648957	-	16816	16816	tRNA
chr6.tRNA139-ValAAC	chr6	27618707	27618779	-	16815	16815	tRNA
DNAJC5	chr20	62526455	62567384	+	16761	16761	RefSeq
hsa-miR-142-3p	chr17	56408606	56408628	-	16687	16687	miRNA
C1orf1681	chr1	57184477	57285369	-	16534	16534	RefSeq_antisense
5S_copy374	chr11	21022427	21022511	-	16506	16506	rRNA
KIAA0825	chr5	93486556	93954309	-	16489	16489	RefSeq
FAM200A	chr7	99143923	99149757	-	16151	16151	RefSeq
KIAA0825:copy2	chr5	93854918	93954309	-	16046	16046	RefSeq
TRPM61	chr9	77337411	77503010	-	16040	16040	RefSeq_antisense
hsa-mir-106b	chr7	99691616	99691697	-	16038	16038	miRNA
Y_RNA:RF00019.453	chr9	77462422	77462517	+	15865	15865	rfam
NSRP1	chr17	28443825	28513493	+	15801	15801	RefSeq
piR-57125	chr5	93905174	93905200	-	15719	15719	piRNA
hsa-mir-423	chr17	28444097	28444190	+	15658	15658	miRNA
ERC21	chr3	55542336	56502391	-	15557	15557	RefSeq_antisense
MSN	chrX	64887511	64961793	+	15469	15469	RefSeq
LOC100288142	chr1	144146811	146467744	+	15370	15370	RefSeq
CACNA2D21	chr3	50400231	50540892	-	15324	15324	RefSeq_antisense
MAEL	chr1	166958519	166991447	+	15279	15279	RefSeq
5S_copy28	chr1	166975196	166975316	+	15269	15269	rRNA
5S_copy115	chr3	50457213	50457332	+	15258	15258	rRNA
5S_copy86	chr2	129202653	129202766	-	15249	15249	rRNA
5S_copy206	chr6	43720580	43720688	+	15231	15231	rRNA
5S_copy117	chr3	56219154	56219252	+	15198	15198	rRNA
U1:RF00003.22	chr1	146556164	146556303	-	15172	15172	rfam
5S_copy511	chr18	29756011	29756130	-	15118	15118	rRNA
5S_copy340	chrY	19669744	19669858	+	15094	15094	rRNA
5S_copy343	chrY	20509919	20510033	-	15094	15094	rRNA
GDNF-AS1	chr5	37840540	37874994	+	15010	15010	other_ncRNA
linc-SATB2-2	chr2	200527510	200715899	-	14979	14979	lincRNA
FTCDNL1	chr2	200625259	200715896	-	14950	14950	other_ncRNA
DTD1	chr20	18568556	18744560	+	14858	14858	RefSeq
hsa-mir-29a	chr7	130561506	130561569	-	14498	14498	miRNA
hsa-miR-29a-3p	chr7	130561507	130561528	-	14323	14323	miRNA
WIPF2	chr17	38375574	38438439	+	14313	14313	RefSeq
FIG41	chr6	110012424	110146634	+	14253	14253	RefSeq_antisense
5S_copy480	chr16	59765259	59765347	+	14244	14244	rRNA
Y_RNA:RF00019.745	chr17	38399475	38399571	+	14225	14225	rfam
5S_copy213	chr6	110074369	110074458	-	14149	14149	rRNA
hsa-miR-423-3p	chr17	28444149	28444171	+	14136	14136	miRNA
RNF219-AS1	chr13	78628990	79191460	+	14096	14096	other_ncRNA
5S_copy37	chr1	204531539	204531649	-	13965	13965	rRNA
U1:RF00003.122	chr17	56754935	56755098	-	13900	13900	rfam
U1:RF00003.9	chr1	96691457	96691616	+	13812	13812	rfam
5S_copy193	chr5	155272447	155272537	+	13737	13737	rRNA
WWP2	chr16	69796187	69975644	+	13689	13689	RefSeq
Y_RNA:RF00019.630	chr13	95988360	95988455	-	13537	13537	rfam
LSU-rRNA_Hsa_copy193	chr19	36066506	36066675	+	13464	13464	rRNA
piR-34535	chrM	12208	12237	+	13452	13452	piRNA
piR-34536	chrM	12208	12238	+	13452	13452	piRNA
piR-34534	chrM	12208	12236	+	13446	13446	piRNA
piR-34531	chrM	12208	12235	+	13436	13436	piRNA
piR-34532	chrM	12208	12235	+	13436	13436	piRNA
piR-34533	chrM	12208	12235	+	13436	13436	piRNA
AKAP121	chr6	151561134	151679694	+	13396	13396	RefSeq_antisense
Y_RNA:RF00019.349	chr6	151619976	151620068	-	13329	13329	rfam
linc-CCDC73	chr11	33025139	33037285	-	13298	13298	lincRNA
Y_RNA:RF00019.521	chr11	33025796	33025891	-	13280	13280	rfam
PPARGC1B	chr5	149109815	149234585	+	13252	13252	RefSeq
hsa-mir-378a	chr5	149112388	149112453	+	13195	13195	miRNA
LSU-rRNA_Hsa_copy192	chr19	24184242	24186210	-	13151	13151	rRNA
ZNF8601	chr3	32023266	32033228	+	13150	13150	RefSeq_antisense
hsa-miR-378a-3p	chr5	149112430	149112450	+	13116	13116	miRNA
ALG9	chr11	111652919	111742305	-	12827	12827	RefSeq
PDE10A1	chr6	165740776	166075588	-	12818	12818	RefSeq_antisense
5S_copy286	chr8	93179689	93179778	-	12672	12672	rRNA
5S_copy233	chr6	165823051	165823140	+	12652	12652	rRNA
hsa-mir-19a	chr13	92003145	92003226	+	12390	12390	miRNA
hsa-miR-19a-3p	chr13	92003193	92003215	+	12372	12372	miRNA
RNU12	chr22	43011251	43011399	+	12365	12365	other_ncRNA
U12:RF00007.1	chr22	43011250	43011399	+	12365	12365	rfam
hsa-mir-27a	chr19	13947254	13947331	-	12232	12232	miRNA
hsa-miR-27a-3p	chr19	13947261	13947281	-	12216	12216	miRNA
LRRTM4	chr2	76974850	77749502	-	12064	12064	RefSeq
piR-51810	chr16	69392614	69392641	+	12008	12008	piRNA
piR-51809	chr16	69392614	69392639	+	12006	12006	piRNA
piR-51811	chr8	68497708	68497734	-	12006	12006	piRNA
C18orf25	chr18	43753988	43846955	+	11948	11948	RefSeq
LINC00478	chr21	17442842	17982094	+	11918	11918	other_ncRNA
LINC00478:copy2	chr21	17566699	17982094	+	11849	11849	other_ncRNA
TBC1D32	chr6	121400627	121655644	-	11840	11840	RefSeq
ABCA13	chr7	48211057	48687091	+	11831	11831	RefSeq
FBXO181	chr10	5931535	5979558	+	11818	11818	RefSeq_antisense
FBXO18:copy21	chr10	5932166	5979558	+	11818	11818	RefSeq_antisense
KHDRBS3	chr8	136469716	136659848	+	11770	11770	RefSeq
SIK31	chr11	116714118	116968993	-	11741	11741	RefSeq_antisense
IFT140	chr16	1560428	1662109	-	11714	11714	RefSeq
NBPF9	chr1	144614959	145370304	+	11709	11709	RefSeq
CCDC72	chr10	32735041	32863492	+	11696	11696	RefSeq_antisense
5S_copy77	chr2	59549315	59549403	+	11608	11608	rRNA
hsa-mir-425	chr3	49057581	49057667	-	11592	11592	miRNA
PI4KA	chr22	21061979	21213100	-	11566	11566	RefSeq
CLSTN21	chr3	139654027	140286919	+	11545	11545	RefSeq_antisense
DHX571	chr2	39024876	39103021	-	11454	11454	RefSeq_antisense
ART11	chr11	3666361	3685646	+	11365	11365	RefSeq_antisense
Y_RNA:RF00019.514	chr11	3685045	3685141	-	11352	11352	rfam
CALCR	chr7	93053799	93204042	-	11256	11256	RefSeq
CDC42	chr1	22379120	22419436	+	11253	11253	RefSeq
PRMT7	chr16	68344877	68391169	+	11247	11247	RefSeq
LSU-rRNA_Hsa_copy191	chr19	24183460	24184250	-	11240	11240	rRNA
linc-MAST4-1:antisense	chr5	65702782	65866254	+	11188	11188	lincRNA_antisense
SYN21	chr3	12045862	12233532	+	11143	11143	RefSeq_antisense
LSU-rRNA_Hsa_copy83	chr6	120583442	120583547	+	11057	11057	rRNA
TIMP4	chr3	12194568	12200851	-	11009	11009	RefSeq
Y_RNA:RF00019.546	chr11	116886613	116886708	+	10949	10949	rfam
DNM1	chr9	130965663	131017527	+	10927	10927	RefSeq
linc-C4orf27-1:antisense	chr4	170838912	170897053	-	10770	10770	lincRNA_antisense
CCDC91	chr12	28410133	28703099	+	10721	10721	RefSeq
5S_copy395	chr12	28658327	28658416	+	10588	10588	rRNA
LSU-rRNA_Hsa_copy149	chr11	111692657	111692748	-	10513	10513	rRNA
U76	chr1	173835773	173835852	-	10508	10508	CDBox
CEP551	chr10	95256369	95288849	+	10505	10505	RefSeq_antisense
SSU_rRNA_eukarya:RF01960.3	chrY	10034865	10036712	+	10491	10491	rfam
SSU-rRNA_Hsa_copy22	chrY	10034865	10036712	+	10491	10491	rRNA
KIF4A	chrX	69509879	69640774	+	10466	10466	RefSeq
5S_copy361	chr10	95270348	95270437	-	10458	10458	rRNA
EHD21	chr19	48216601	48246391	+	10419	10419	RefSeq_antisense
NOTCH2	chr1	120454176	120612317	-	10377	10377	RefSeq
PARD3	chr10	34398488	35104253	-	10366	10366	RefSeq
NOTCH2:copy2	chr1	120477736	120612317	-	10356	10356	RefSeq
NOTCH2NL	chr1	145209111	145285912	+	10336	10336	RefSeq
Y_RNA:RF00019.871	chrX	69616129	69616225	+	10329	10329	rfam
UNC791	chr14	93799565	94173689	+	10327	10327	RefSeq_antisense
hsa-mir-148a	chr7	25989539	25989606	-	10314	10314	miRNA
LSU-rRNA_Hsa_copy12	chr1	120543884	120544125	-	10290	10290	rRNA
LSU-rRNA_Hsa_copy13	chr1	145277250	145277491	+	10290	10290	rRNA
hsa-miR-148a-3p	chr7	25989542	25989563	-	10284	10284	miRNA
LSU-rRNA_Hsa_copy28	chr2	78928722	78928992	+	10217	10217	rRNA
CCDC1581	chr4	77234192	77328458	-	10211	10211	RefSeq_antisense
let-7:RF00027.10	chr21	17912152	17912227	+	10196	10196	rfam
hsa-let-7c	chr21	17912148	17912231	+	10194	10194	miRNA
piR-49145	chr21	17912158	17912189	+	10194	10194	piRNA
SH3GL21	chr9	17578953	17797122	+	10130	10130	RefSeq_antisense
Y_RNA:RF00019.665	chr14	93863485	93863580	-	10113	10113	rfam
STAG11	chr3	136055999	136471245	-	10105	10105	RefSeq_antisense
linc-ARF6-1:antisense	chr14	50320358	50329571	+	10073	10073	lincRNA_antisense
MARCO	chr2	119699745	119752236	+	10031	10031	RefSeq
PLCE11	chr10	95753746	96088148	+	9954	9954	RefSeq_antisense
ATP10A1	chr15	25923860	26108349	-	9921	9921	RefSeq_antisense
Y_RNA:RF00019.479	chr10	34490907	34491002	-	9915	9915	rfam
Y_RNA:RF00019.153	chr3	20234274	20234366	-	9864	9864	rfam
linc-CDH5-12	chr16	60398716	60530011	+	9830	9830	lincRNA
COQ5	chr12	120941082	120966964	-	9825	9825	RefSeq
Y_RNA:RF00019.669	chr15	26063130	26063217	+	9819	9819	rfam
Y_RNA:RF00019.615	chr13	50482770	50482866	-	9798	9798	rfam
Y_RNA:RF00019.598	chr12	120942374	120942462	-	9797	9797	rfam
API5	chr11	43333505	43366080	+	9795	9795	other_ncRNA
Y_RNA:RF00019.526	chr11	43352811	43352906	+	9778	9778	rfam
LSU-rRNA_Hsa_copy35	chr2	203210989	203211097	-	9760	9760	rRNA
Y_RNA:RF00019.192	chr3	136307051	136307153	+	9755	9755	rfam
G3BP2	chr4	76567953	76598667	-	9754	9754	RefSeq
Y_RNA:RF00019.548	chr11	118841208	118841305	+	9752	9752	rfam
RIOK3	chr18	21032787	21063099	+	9749	9749	RefSeq
5S_copy316	chrX	41152051	41152140	+	9743	9743	rRNA
ATP5G3	chr2	176040986	176046490	-	9739	9739	RefSeq
Y_RNA:RF00019.570	chr12	49526636	49526730	-	9736	9736	rfam
Y_RNA:RF00019.132	chr2	176041221	176041314	-	9734	9734	rfam
Y_RNA:RF00019.748	chr17	41149933	41150024	-	9734	9734	rfam
Y_RNA:RF00019.226	chr4	76587304	76587397	-	9726	9726	rfam
Y_RNA:RF00019.780	chr18	21036335	21036431	+	9719	9719	rfam
Y_RNA:RF00019.76	chr1	234973723	234973816	+	9716	9716	rfam
Y_RNA:RF00019.500	chr10	95806795	95806882	-	9712	9712	rfam
Y_RNA:RF00019.24	chr1	44619057	44619152	-	9704	9704	rfam
Y_RNA:RF00019.462	chr9	113859605	113859693	-	9703	9703	rfam
CLK1	chr2	201717732	201729467	-	9700	9700	RefSeq
Y_RNA:RF00019.138	chr2	201727875	201727970	-	9686	9686	rfam
UBAP11	chr9	34179003	34252521	+	9683	9683	RefSeq_antisense
Y_RNA:RF00019.878	chrX	102411046	102411139	-	9679	9679	rfam
Y_RNA:RF00019.397	chr7	138100225	138100319	+	9671	9671	rfam
PROS11	chr3	93591881	93692934	-	9666	9666	RefSeq_antisense
Y_RNA:RF00019.728	chr16	69814940	69815031	+	9663	9663	rfam
hsa-miR-425-5p	chr3	49057632	49057654	-	9661	9661	miRNA
hsa-miR-106b-3p	chr7	99691625	99691646	-	9616	9616	miRNA
Y_RNA:RF00019.441	chr9	34194810	34194905	-	9601	9601	rfam
Y_RNA:RF00019.176	chr3	93686770	93686864	+	9592	9592	rfam
RPS8	chr1	45241246	45244412	+	9586	9586	RefSeq
GNPTAB1	chr12	102139275	102224645	-	9550	9550	RefSeq_antisense
Y_RNA:RF00019.618	chr13	59101789	59101885	-	9498	9498	rfam
Y_RNA:RF00019.614	chr13	50463770	50463864	-	9482	9482	rfam
linc-PCDH11Y:antisense	chrY	3904538	3968361	+	9426	9426	lincRNA_antisense
PARK2	chr6	161768590	163148834	-	9423	9423	RefSeq
KCNH5:copy21	chr14	63178958	63568584	-	9274	9274	RefSeq_antisense
KCNH51	chr14	63173291	63511956	-	9267	9267	RefSeq_antisense
STK38L	chr12	27397078	27478890	+	9236	9236	RefSeq
NRG1	chr8	31497268	32600770	+	9208	9208	RefSeq
NSA21	chr5	74062816	74072737	+	9178	9178	RefSeq_antisense
RAI14	chr5	34656433	34832717	+	9172	9172	RefSeq
LRRK11	chr15	101459460	101610317	+	9148	9148	RefSeq_antisense
RAI14:copy2	chr5	34684612	34832717	+	9134	9134	RefSeq
RAI14:copy3	chr5	34687664	34832717	+	9134	9134	RefSeq
SLC39A10	chr2	196521532	196602426	+	9128	9128	RefSeq
HNRNPK	chr9	86582998	86595569	-	9118	9118	RefSeq
hsa-mir-7-1	chr9	86584663	86584772	-	9093	9093	miRNA
RNY4	chr6	80451636	80451669	+	9067	9067	other_ncRNA
piR-33043	chr1	204640858	204640885	+	9067	9067	piRNA
piR-33044	chr1	204640858	204640882	+	9067	9067	piRNA
5S_copy172	chr5	34802385	34802473	+	9038	9038	rRNA
CLCN5	chrX	49687225	49863892	+	9037	9037	RefSeq
TRAK21	chr2	202241930	202316319	-	9006	9006	RefSeq_antisense
SMC51	chr9	72873878	72969789	+	8985	8985	RefSeq_antisense
Y_RNA:RF00019.139	chr2	202288236	202288327	+	8982	8982	rfam
hsa-miR-7-5p	chr15	89155087	89155109	+	8966	8966	miRNA
Y_RNA:RF00019.451	chr9	72926523	72926617	-	8946	8946	rfam
hsa-mir-7-2	chr15	89155056	89155165	+	8910	8910	miRNA
hsa-mir-7-3	chr19	4770682	4770791	+	8892	8892	miRNA
Y_RNA:RF00019.110	chr2	88529088	88529183	-	8743	8743	rfam
hsa-mir-454	chr17	57215119	57215233	-	8677	8677	miRNA
hsa-mir-24-2	chr19	13947101	13947173	-	8654	8654	miRNA
linc-ITIH2-3:antisense	chr10	7176323	7186792	+	8628	8628	lincRNA_antisense
chr13.tRNA3-GluTTC	chr13	45492062	45492133	-	8585	8585	tRNA
ICA11	chr7	8152815	8302242	-	8527	8527	RefSeq_antisense
chr15.tRNA11-GluTTC	chr15	26327381	26327452	-	8494	8494	tRNA
TMEM178B	chr7	140774032	141180179	+	8484	8484	RefSeq
RPS12	chr6	133135708	133138703	+	8454	8454	RefSeq
linc-HARS-2:antisense	chr5	140088281	140091097	-	8403	8403	lincRNA_antisense
VTRNA1-1	chr5	140090861	140090958	+	8396	8396	other_ncRNA
Vault:RF00006.4	chr5	140090860	140090958	+	8396	8396	rfam
U29	chr11	62621376	62621440	-	8339	8339	CDBox
5S_copy274	chr8	32114012	32114124	+	8314	8314	rRNA
5S_copy407	chr12	102173592	102173682	+	8281	8281	rRNA
SHF	chr15	45459412	45493373	-	8238	8238	RefSeq
hsa-miR-454-3p	chr17	57215148	57215170	-	8233	8233	miRNA
MDGA2	chr14	47308826	48144157	-	8212	8212	RefSeq
5S_copy388	chr11	110910844	110910932	-	8187	8187	rRNA
hsa-miR-24-3p	chr19	13947103	13947124	-	8159	8159	miRNA
hsa-mir-24-1	chr9	97848303	97848370	+	8159	8159	miRNA
PLEKHA8P1	chr12	45566817	45609789	-	8106	8106	other_ncRNA
RNY5	chr12	45580874	45581252	-	8078	8078	other_ncRNA
5S_copy147	chr4	56963557	56963645	+	7965	7965	rRNA
ZNF148	chr3	124944513	125094198	-	7935	7935	RefSeq
mgh28S-2411	chr11	93464669	93464739	-	7926	7926	CDBox
FAM184A1	chr6	119280996	119470358	-	7926	7926	RefSeq_antisense
snoZ40:RF00342.2	chr11	93464668	93464740	-	7926	7926	rfam
LSU-rRNA_Hsa_copy34	chr2	191402648	191402786	-	7917	7917	rRNA
piR-30112	chr11	93464709	93464738	-	7897	7897	piRNA
SORCS2	chr4	7194374	7744564	+	7890	7890	RefSeq
XRN1	chr3	142025449	142166853	-	7880	7880	RefSeq
Y_RNA:RF00019.339	chr6	119379045	119379139	+	7826	7826	rfam
XPNPEP21	chrX	128872946	128903525	+	7811	7811	RefSeq_antisense
GAS2	chr11	22688160	22834547	+	7769	7769	RefSeq
GAS2:copy2	chr11	22696319	22834547	+	7768	7768	RefSeq
LSU-rRNA_Hsa_copy176	chr17	19355539	19356096	+	7746	7746	rRNA
LSU-rRNA_Hsa_copy52	chr4	7584187	7584364	+	7694	7694	rRNA
hsa-mir-210	chr11	568089	568198	-	7653	7653	miRNA
hsa-miR-210	chr11	568112	568133	-	7647	7647	miRNA
FLVCR2	chr14	76044940	76114512	+	7471	7471	RefSeq
LSU-rRNA_Hsa_copy196	chr19	42070202	42070694	-	7467	7467	rRNA
5S_copy452	chr14	76070516	76070605	+	7441	7441	rRNA
COL22A1	chr8	139600478	139926236	-	7330	7330	RefSeq
LTA4H1	chr12	96394531	96437298	-	7306	7306	RefSeq_antisense
chr1.tRNA71-GluCTC	chr1	161439189	161439260	-	7288	7288	tRNA
chr1.tRNA74-GluCTC	chr1	161431809	161431880	-	7288	7288	tRNA
chr1.tRNA77-GluCTC	chr1	161424398	161424469	-	7288	7288	tRNA
chr1.tRNA80-GluCTC	chr1	161417018	161417089	-	7288	7288	tRNA
chr1.tRNA69-AspGTC	chr1	161440205	161440276	-	7287	7287	tRNA
chr1.tRNA72-AspGTC	chr1	161432824	161432895	-	7287	7287	tRNA
chr1.tRNA75-AspGTC	chr1	161425414	161425485	-	7287	7287	tRNA
chr1.tRNA78-AspGTC	chr1	161418033	161418104	-	7287	7287	tRNA
chr1.tRNA81-AspGTC	chr1	161410615	161410686	-	7287	7287	tRNA
chr12.tRNA4-AspGTC	chr12	96429799	96429870	+	7287	7287	tRNA
hsa-let-7d	chr9	96941116	96941202	+	7275	7275	miRNA
let-7:RF00027.5	chr9	96941117	96941201	+	7275	7275	rfam
piR-31447	chr11	93464672	93464701	-	7262	7262	piRNA
5S_copy291	chr8	139815623	139815693	-	7185	7185	rRNA
5S_copy376	chr11	22709897	22709986	+	7174	7174	rRNA
hsa-let-7d-5p	chr9	96941123	96941144	+	7168	7168	miRNA
GRM8:antisense	chr7	126078652	126892428	-	7166	7166	other_ncRNA_antisense
chr12.tRNA10-AspGTC	chr12	125424193	125424264	-	7112	7112	tRNA
hsa-mir-15a	chr13	50623255	50623337	-	7111	7111	miRNA
chr12.tRNA12-AspGTC	chr12	125411891	125411962	-	7110	7110	tRNA
ST5	chr11	8714899	8932498	-	7104	7104	RefSeq
hsa-miR-15a-5p	chr13	50623303	50623324	-	7101	7101	miRNA
C10orf531	chr10	50887684	50916956	+	7081	7081	RefSeq_antisense
hsa-mir-6087	chrX	108297772	108297820	+	7069	7069	miRNA
LSU-rRNA_Hsa_copy131	chr10	50911037	50911419	-	7064	7064	rRNA
5S_copy538	chr20	30596179	30596240	+	6983	6983	rRNA
chr1.tRNA116-GluCTC	chr1	145399233	145399304	-	6972	6972	tRNA
chr6.tRNA77-GluCTC	chr6	28949976	28950047	+	6972	6972	tRNA
tRNA-Glu-GAG__copy60	chr6_apd_hap1	253378	253449	+	6972	6972	tRNA_like
tRNA-Glu-GAG__copy61	chr6_cox_hap2	468779	468850	+	6972	6972	tRNA_like
tRNA-Glu-GAG__copy62	chr6_dbb_hap3	253387	253458	+	6972	6972	tRNA_like
tRNA-Glu-GAG__copy63	chr6_qbl_hap6	253373	253444	+	6972	6972	tRNA_like
tRNA-Glu-GAG__copy64	chr6_mann_hap4	253379	253450	+	6972	6972	tRNA_like
tRNA-Glu-GAG__copy65	chr6_ssto_hap7	290947	291018	+	6972	6972	tRNA_like
HDAC8	chrX	71549366	71792953	-	6963	6963	other_ncRNA
chr6.tRNA87-GluCTC	chr6	126101393	126101464	-	6959	6959	tRNA
MIPEPP3	chr13	21872264	21967061	+	6935	6935	other_ncRNA
5S_copy266	chr8	13393538	13393617	+	6904	6904	rRNA
C15orf52	chr15	40623653	40633168	-	6887	6887	RefSeq
IPO81	chr12	30781915	30848929	-	6885	6885	RefSeq_antisense
5S_copy460	chr15	40623773	40623849	-	6875	6875	rRNA
ATRNL1:antisense	chr10	116853124	117708496	+	6815	6815	other_ncRNA_antisense
LPP	chr3	187871663	188608460	+	6802	6802	RefSeq
HDAC9:copy21	chr7	18535369	19036992	+	6802	6802	RefSeq_antisense
LPP:copy2	chr3	187930721	188608460	+	6766	6766	RefSeq
AGBL4	chr1	48998527	50489626	-	6763	6763	RefSeq
U2:RF00004.88	chrX	71596829	71597019	-	6741	6741	rfam
NPAS31	chr14	33408459	34273382	+	6705	6705	RefSeq_antisense
hsa-mir-27b	chr9	97847727	97847823	+	6677	6677	miRNA
Y_RNA:RF00019.723	chr16	66584360	66584470	+	6672	6672	rfam
hsa-miR-27b-3p	chr9	97847787	97847807	+	6670	6670	miRNA
linc-EPHA6-2:antisense	chr3	96199795	96232359	+	6635	6635	lincRNA_antisense
FMN2	chr1	240255185	240638489	+	6635	6635	RefSeq
SORBS2	chr4	186506598	186877870	-	6569	6569	RefSeq
TMEM56:copy21	chr1	95582894	95710509	+	6562	6562	RefSeq_antisense
TMEM561	chr1	95558073	95663161	+	6549	6549	RefSeq_antisense
chr1.tRNA59-GluCTC	chr1	249168447	249168518	+	6524	6524	tRNA
PAQR5	chr15	69591294	69699976	+	6522	6522	RefSeq
SGK11	chr6	134490384	134639196	-	6520	6520	RefSeq_antisense
PAQR5:copy2	chr15	69606742	69699976	+	6517	6517	RefSeq
LINC00324	chr17	8123948	8127361	-	6507	6507	other_ncRNA
KDM4C	chr9	6720863	7077264	+	6500	6500	RefSeq
FAM175B1	chr10	126490354	126525239	+	6499	6499	RefSeq_antisense
TSTD3	chr6	99968870	99981059	+	6494	6494	RefSeq
KDM4C:copy2	chr9	6757641	7175648	+	6490	6490	RefSeq
Y_RNA:RF00019.333	chr6	99973973	99974081	+	6486	6486	rfam
Y_RNA:RF00019.891	chrX	135653864	135653974	-	6478	6478	rfam
Y_RNA:RF00019.510	chr10	126503527	126503631	-	6473	6473	rfam
Y_RNA:RF00019.641	chr14	39456485	39456587	+	6466	6466	rfam
ASB7	chr15	101142755	101191904	+	6462	6462	RefSeq
hsa-mir-28	chr3	188406569	188406654	+	6456	6456	miRNA
Y_RNA:RF00019.79	chr1	240504685	240504777	+	6456	6456	rfam
Y_RNA:RF00019.569	chr12	49321722	49321816	-	6452	6452	rfam
Y_RNA:RF00019.654	chr14	68084019	68084132	-	6451	6451	rfam
Y_RNA:RF00019.124	chr2	148229701	148229811	-	6450	6450	rfam
Y_RNA:RF00019.482	chr10	38283791	38283903	+	6449	6449	rfam
Y_RNA:RF00019.703	chr15	101178568	101178662	+	6446	6446	rfam
SNX110	chr15	64388083	64436433	+	6440	6440	RefSeq_antisense
Y_RNA:RF00019.602	chr12	131391383	131391494	+	6437	6437	rfam
SORD1	chr15	45315302	45367287	+	6436	6436	RefSeq_antisense
Y_RNA:RF00019.256	chr4	186631027	186631121	-	6431	6431	rfam
hsa-miR-106b-5p	chr7	99691666	99691686	-	6422	6422	miRNA
piR-36984	chr7	99691656	99691686	-	6422	6422	piRNA
Y_RNA:RF00019.585	chr12	96011465	96011562	+	6421	6421	rfam
LSU-rRNA_Hsa_copy46	chr3	117985770	117985855	+	6416	6416	rRNA
Y_RNA:RF00019.693	chr15	64403657	64403768	-	6408	6408	rfam
5S_copy222	chr6	134578173	134578282	+	6405	6405	rRNA
LOC284454	chr19	13945330	13947103	-	6401	6401	other_ncRNA
RALA1	chr7	39663152	39747723	+	6393	6393	RefSeq_antisense
Y_RNA:RF00019.681	chr15	45135810	45135922	+	6362	6362	rfam
Y_RNA:RF00019.682	chr15	45339301	45339413	-	6362	6362	rfam
Y_RNA:RF00019.251	chr4	159985449	159985550	-	6361	6361	rfam
Y_RNA:RF00019.699	chr15	69698780	69698891	+	6358	6358	rfam
ACA45	chr15	83424697	83424823	+	6311	6311	scaRNA
WDR891	chr14	64063757	64108641	-	6293	6293	RefSeq_antisense
CORO2B1	chr15	68871308	69020144	+	6290	6290	RefSeq_antisense
CORO2B:copy21	chr15	68908879	69020144	+	6280	6280	RefSeq_antisense
HOXA9	chr7	27202057	27219880	-	6275	6275	RefSeq
HOXA-AS4:antisense	chr7	27208518	27211534	+	6266	6266	other_ncRNA_antisense
hsa-mir-196b	chr7	27209099	27209182	-	6265	6265	miRNA
CORO2B:copy31	chr15	68924327	69020144	+	6255	6255	RefSeq_antisense
MYH91	chr22	36677323	36784063	-	6253	6253	RefSeq_antisense
hsa-miR-196b-5p	chr7	27209147	27209168	-	6247	6247	miRNA
hsa-mir-29b-2	chr1	207975788	207975868	-	6245	6245	miRNA
LSU-rRNA_Hsa_copy194	chr19	36066691	36066749	+	6244	6244	rRNA
ECEL1	chr2	233344537	233352532	-	6243	6243	RefSeq
U1:RF00003.13	chr1	143673129	143673290	-	6238	6238	rfam
U1:RF00003.29	chr1	147860642	147860803	-	6238	6238	rfam
Y_RNA:RF00019.650	chr14	64088478	64088589	+	6234	6234	rfam
HLF1	chr17	53342321	53402426	+	6224	6224	RefSeq_antisense
C20orf166	chr20	61147660	61167971	+	6214	6214	RefSeq
hsa-mir-29b-1	chr7	130562218	130562298	-	6208	6208	miRNA
TSC22D31	chrX	106956452	107019017	-	6208	6208	RefSeq_antisense
RFTN1	chr3	16357352	16555222	-	6195	6195	RefSeq
hsa-miR-29b-3p	chr1	207975795	207975817	-	6187	6187	miRNA
chr17.tRNA38-AspGTC	chr17	8125556	8125627	-	6184	6184	tRNA
CHMP4B1	chr20	32399110	32442173	+	6179	6179	RefSeq_antisense
chr6.tRNA45-AspGTC	chr6	27447453	27447524	+	6175	6175	tRNA
chr6.tRNA48-AspGTC	chr6	27471523	27471594	+	6175	6175	tRNA
PCBD21	chr5	134240810	134298336	+	6170	6170	RefSeq_antisense
linc-SDCCAG1-2	chr14	50328594	50331183	-	6168	6168	lincRNA
Metazoa_SRP:RF00017.602	chr14	50329268	50329567	-	6159	6159	rfam
PARD3B	chr2	205410516	206484886	+	6134	6134	RefSeq
KIAA1217	chr10	23983675	24836772	+	6106	6106	RefSeq
LSU-rRNA_Hsa_copy109	chr8	109304592	109304662	-	6078	6078	rRNA
Metazoa_SRP:RF00017.600	chr14	50053298	50053596	+	6063	6063	rfam
NRXN1	chr2	50145643	51259674	-	6048	6048	RefSeq
SNHG5	chr6	86386725	86388451	-	5991	5991	other_ncRNA
hsa-mir-124-1	chr8	9760898	9760982	-	5970	5970	miRNA
hsa-mir-124-2	chr8	65291706	65291814	+	5970	5970	miRNA
hsa-mir-124-3	chr20	61809852	61809938	+	5967	5967	miRNA
DPP101	chr2	115199899	116602326	+	5925	5925	RefSeq_antisense
DPP10:copy21	chr2	115219180	116602326	+	5916	5916	RefSeq_antisense
DOK6	chr18	67068284	67516322	+	5884	5884	RefSeq
hsa-miR-124-3p	chr20	61809904	61809923	+	5842	5842	miRNA
hsa-miR-28-3p	chr3	188406622	188406643	+	5835	5835	miRNA
KIAA0753	chr17	6481645	6544247	-	5768	5768	RefSeq
5S_copy528	chr19	58378631	58378720	+	5766	5766	rRNA
5S_copy489	chr17	6504282	6504371	-	5743	5743	rRNA
Y_RNA:RF00019.308	chr6	25192641	25192718	+	5738	5738	rfam
CASC41	chr15	44580909	44707959	+	5679	5679	RefSeq_antisense
LSU-rRNA_Hsa_copy182	chr17	55868619	55868752	-	5621	5621	rRNA
OSGEPL11	chr2	190611386	190627924	-	5605	5605	RefSeq_antisense
UTRN1	chr6	144612873	145174170	+	5587	5587	RefSeq_antisense
Y_RNA:RF00019.136	chr2	190618190	190618285	+	5585	5585	rfam
FTX	chrX	73247971	73513409	-	5583	5583	other_ncRNA
U44	chr1	173835104	173835166	-	5579	5579	CDBox
CHSY3	chr5	129240523	129522327	+	5511	5511	RefSeq
piR-32376	chr11	10530774	10530804	-	5492	5492	piRNA
piR-32377	chr11	10530774	10530804	-	5492	5492	piRNA
LINGO21	chr9	27948084	29212998	-	5471	5471	RefSeq_antisense
PPEF21	chr4	76781026	76823681	-	5443	5443	RefSeq_antisense
hsa-miR-30e-5p	chr1	41220043	41220064	+	5442	5442	miRNA
LSU-rRNA_Hsa_copy54	chr4	76807176	76807697	+	5413	5413	rRNA
5S_copy184	chr5	129450096	129450185	+	5392	5392	rRNA
SLC25A43	chrX	118533258	118588437	+	5388	5388	RefSeq
5S_copy254	chr7	128337506	128337612	+	5387	5387	rRNA
THAP81	chr19	36525887	36545664	-	5351	5351	RefSeq_antisense
chr6.tRNA33-HisGTG	chr6	27125906	27125977	+	5335	5335	tRNA
chr9.tRNA7-HisGTG	chr9	14433938	14434009	-	5334	5334	tRNA
Y_RNA:RF00019.795	chr19	36540048	36540126	+	5333	5333	rfam
ZFAND3	chr6	37787307	38122399	+	5331	5331	RefSeq
LSU-rRNA_Hsa_copy187	chr18	77772847	77773065	+	5304	5304	rRNA
BIVM	chr13	103451399	103528351	+	5180	5180	RefSeq
U1:RF00003.139	chrX	118557705	118557868	+	5180	5180	rfam
ZNF286A	chr17	15602891	15624100	+	5172	5172	RefSeq
HP1	chr16	72088508	72094955	+	5158	5158	RefSeq_antisense
HPR1	chr16	72097125	72111145	+	5157	5157	RefSeq_antisense
hsa-mir-222	chrX	45606421	45606530	-	5154	5154	miRNA
chr19.tRNA13-ValCAC	chr19	4724647	4724719	-	5152	5152	tRNA
VAMP4	chr1	171669296	171711379	-	5148	5148	RefSeq
hsa-miR-222-3p	chrX	45606442	45606462	-	5147	5147	miRNA
Y_RNA:RF00019.633	chr13	103472343	103472419	+	5129	5129	rfam
Y_RNA:RF00019.18	chr1	35893417	35893494	-	5117	5117	rfam
EVA1C1	chr21	33784752	33887697	+	5114	5114	RefSeq_antisense
5S_copy201	chr6	19438514	19438604	+	5107	5107	rRNA
CTNNA3	chr10	67679725	69455949	-	5091	5091	RefSeq
5S_copy127	chr3	133428930	133429019	-	5065	5065	rRNA
5S_copy118	chr3	61068548	61068637	-	5063	5063	rRNA
RPL4	chr15	66791653	66797193	-	5057	5057	RefSeq
piR-35550	chr7	145694484	145694510	+	5053	5053	piRNA
piR-35551	chr7	145694484	145694512	+	5053	5053	piRNA
ANLN1	chr7	36429432	36493400	+	5053	5053	RefSeq_antisense
piR-35549	chr7	145694484	145694509	+	5052	5052	piRNA
5S_copy75	chr2	50196805	50196894	-	5048	5048	rRNA
5S_copy230	chr6	153741576	153741661	+	4966	4966	rRNA
LSU-rRNA_Hsa_copy24	chr2	61892493	61892559	+	4911	4911	rRNA
TNFRSF191	chr13	24144509	24250244	+	4872	4872	RefSeq_antisense
TNFRSF19:copy21	chr13	24153499	24250244	+	4869	4869	RefSeq_antisense
SNX41	chr3	125165488	125239058	-	4836	4836	RefSeq_antisense
KCNH5:copy2	chr14	63178958	63568584	-	4799	4799	RefSeq
KCNH5	chr14	63173291	63511956	-	4787	4787	RefSeq
chr5.tRNA15-ValAAC	chr5	180615416	180615488	-	4778	4778	tRNA
SIAE1	chr11	124505685	124546199	-	4770	4770	RefSeq_antisense
5S_copy390	chr11	124506355	124506444	+	4743	4743	rRNA
FZD3	chr8	28351722	28431785	+	4710	4710	RefSeq
NAV21	chr11	19372271	20143147	+	4708	4708	RefSeq_antisense
RHPN21	chr19	33469498	33555824	-	4702	4702	RefSeq_antisense
Y_RNA:RF00019.187	chr3	125235823	125235930	+	4678	4678	rfam
5S_copy270	chr8	28387928	28388016	+	4677	4677	rRNA
DACH2	chrX	85403455	86087605	+	4667	4667	RefSeq
hsa-mir-941-3	chr20	62551085	62551201	+	4656	4656	miRNA
DACH2:copy2	chrX	85517971	86087605	+	4635	4635	RefSeq
GNL3	chr3	52719936	52728510	+	4606	4606	RefSeq
Y_RNA:RF00019.128	chr2	171639677	171639781	+	4591	4591	rfam
ZNF277	chr7	111846643	111983989	+	4553	4553	RefSeq
U38A	chr1	45243514	45243584	+	4515	4515	CDBox
LRRN21	chr1	204586303	204654597	-	4511	4511	RefSeq_antisense
FCRL2	chr1	157715523	157746922	-	4510	4510	RefSeq
PTPRD1	chr9	8314246	10612723	-	4502	4502	RefSeq_antisense
ABCB101	chr1	229652329	229694442	-	4481	4481	RefSeq_antisense
LRP13	chr12	57522282	57607125	+	4471	4471	RefSeq_antisense
U101	chr6	133136446	133136518	+	4459	4459	CDBox
tRNA-Gly-GGY_copy2	chr1	229673604	229673639	+	4437	4437	tRNA_like
hsa-mir-30c-1	chr1	41222956	41223044	+	4403	4403	miRNA
MIB11	chr18	19321290	19450918	+	4388	4388	RefSeq_antisense
hsa-miR-30c-5p	chr1	41222972	41222994	+	4373	4373	miRNA
hsa-mir-30c-2	chr6	72086663	72086734	-	4373	4373	miRNA
LSU-rRNA_Hsa_copy29	chr2	115695018	115695281	-	4361	4361	rRNA
U2:RF00004.75	chr15	96289033	96289223	+	4353	4353	rfam
ZC4H2	chrX	64135682	64254624	-	4346	4346	RefSeq
RPL3	chr22	39708887	39715670	-	4317	4317	RefSeq
ABI21	chr2	204193003	204296892	+	4310	4310	RefSeq_antisense
LSU-rRNA_Hsa_copy87	chr6	144692197	144692284	-	4301	4301	rRNA
tRNA-Gly-GGY_copy11	chrX	64237839	64237866	-	4291	4291	tRNA_like
SMG6:antisense	chr17	1963133	2207069	-	4274	4274	other_ncRNA_antisense
CAMTA11	chr1	6845384	7829766	+	4264	4264	RefSeq_antisense
5S_copy373	chr11	19423439	19423528	-	4254	4254	rRNA
chr2.tRNA17-PseudoTTC	chr2	204229131	204229201	-	4197	4197	tRNA
GSG1L1	chr16	27798850	28074830	-	4195	4195	RefSeq_antisense
hsa-mir-532	chrX	49767754	49767844	+	4189	4189	miRNA
hsa-miR-532-5p	chrX	49767773	49767794	+	4173	4173	miRNA
LRRTM31	chr10	68685792	68860867	+	4161	4161	RefSeq_antisense
5_8S_rRNA:RF00002.4	chr19	24187160	24187309	-	4155	4155	rfam
U26	chr11	62622764	62622838	-	4153	4153	CDBox
linc-CRBN:antisense	chr3	3292371	3668980	-	4123	4123	lincRNA_antisense
LSU-rRNA_Hsa_copy134	chr10	68805211	68805496	-	4109	4109	rRNA
chr15.tRNA9-HisGTG	chr15	45490804	45490875	-	4103	4103	tRNA
chr1.tRNA111-HisGTG	chr1	147774845	147774916	-	4102	4102	tRNA
chr1.tRNA118-HisGTG	chr1	145396881	145396952	-	4102	4102	tRNA
chr1.tRNA16-HisGTG	chr1	146544773	146544844	+	4102	4102	tRNA
chr1.tRNA21-HisGTG	chr1	147753471	147753542	+	4102	4102	tRNA
chr15.tRNA1-HisGTG	chr15	45493349	45493420	+	4102	4102	tRNA
chr15.tRNA8-HisGTG	chr15	45492611	45492682	-	4102	4102	tRNA
hsa-mir-769	chr19	46522190	46522307	+	4091	4091	miRNA
linc-CRBN:copy2:antisense	chr3	3302491	3525799	-	4073	4073	lincRNA_antisense
HBII-210	chr3	52726752	52726828	+	4070	4070	CDBox
U38B	chr1	45244062	45244130	+	4068	4068	CDBox
hsa-miR-769-5p	chr19	46522219	46522240	+	4031	4031	miRNA
Y_RNA:RF00019.621	chr13	61390835	61390920	-	4005	4005	rfam
SHCBP1L	chr1	182869000	182922553	-	3991	3991	RefSeq
ARNTL1	chr11	13299325	13408812	+	3990	3990	RefSeq_antisense
SHF1	chr15	45459412	45493373	-	3984	3984	RefSeq_antisense
LSU-rRNA_Hsa_copy10	chr1	108113072	108113633	-	3973	3973	rRNA
U47	chr1	173833508	173833572	-	3971	3971	CDBox
WWP2:copy2	chr16	69872640	69975644	+	3948	3948	RefSeq
5S_copy33	chr1	182913540	182913624	-	3945	3945	rRNA
5S_copy481	chr16	66335712	66335801	+	3940	3940	rRNA
5S_copy445	chr14	22069930	22070018	-	3915	3915	rRNA
Metazoa_SRP:RF00017.601	chr14	50320334	50320632	-	3906	3906	rfam
MYO5B	chr18	47349156	47721451	-	3886	3886	RefSeq
PTPRG1	chr3	61547243	62280573	+	3882	3882	RefSeq_antisense
hsa-mir-660	chrX	49777849	49777945	+	3837	3837	miRNA
U50B	chr6	86387307	86387377	-	3829	3829	CDBox
HBII-429	chr6	133137941	133138016	+	3827	3827	CDBox
NOXRED1	chr14	77860365	77889399	-	3827	3827	RefSeq
hsa-miR-660-5p	chrX	49777864	49777885	+	3826	3826	miRNA
hsa-miR-21-3p	chr17	57918672	57918692	+	3821	3821	miRNA
USP53	chr4	120133782	120216673	+	3814	3814	RefSeq
5S_copy171	chr5	33277967	33278059	-	3798	3798	rRNA
5S_copy453	chr14	77870248	77870336	-	3766	3766	rRNA
LSU-rRNA_Hsa_copy59	chr4	120158525	120158690	+	3752	3752	rRNA
5S_copy162	chr4	178378293	178378382	-	3749	3749	rRNA
RBMS31	chr3	29322803	30051886	+	3742	3742	RefSeq_antisense
piR-33748	chr6	133137966	133137994	+	3731	3731	piRNA
piR-45371	chr6	133137967	133137992	+	3724	3724	piRNA
GCNT2	chr6	10521568	10629601	+	3722	3722	RefSeq
5S_copy515	chr18	47472671	47472758	-	3710	3710	rRNA
hsa-mir-18a	chr13	92003005	92003075	+	3705	3705	miRNA
GCNT2:copy2	chr6	10555949	10629601	+	3700	3700	RefSeq
hsa-miR-6087	chrX	108297774	108297791	+	3699	3699	miRNA
U1:RF00003.33	chr1	148604908	148605072	-	3689	3689	rfam
GCNT2:copy3	chr6	10585993	10629601	+	3678	3678	RefSeq
2018-09-06	chrX	118749688	118827333	-	3671	3671	RefSeq
SEPT6:copy2	chrX	118750909	118827333	-	3671	3671	RefSeq
FAM69A1	chr1	93298286	93427079	-	3658	3658	RefSeq_antisense
RPL13A	chr19	49990811	49995564	+	3602	3602	RefSeq
hsa-mir-30d	chr8	135817119	135817188	-	3599	3599	miRNA
RPL5	chr1	93297594	93307481	+	3579	3579	RefSeq
hsa-mir-766	chrX	118780701	118780811	-	3577	3577	miRNA
TC2N	chr14	92246267	92333880	-	3547	3547	RefSeq
C6orf48	chr6_dbb_hap3	3088280	3093127	+	3524	3524	RefSeq
C6orf48:copy2	chr6_qbl_hap6	3096352	3101196	+	3524	3524	RefSeq
C6orf48:copy3	chr6_apd_hap1	3117447	3122295	+	3524	3524	RefSeq
C6orf48:copy4	chr6_cox_hap2	3312269	3317112	+	3524	3524	RefSeq
WWP2:copy3	chr16	69958886	69975644	+	3515	3515	RefSeq
hsa-miR-30d-5p	chr8	135817162	135817183	-	3510	3510	miRNA
hsa-mir-140	chr16	69966984	69967083	+	3510	3510	miRNA
Metazoa_SRP:RF00017.415	chr9	9442060	9442380	+	3508	3508	rfam
hsa-miR-766-3p	chrX	118780726	118780747	-	3499	3499	miRNA
GREB1	chr2	11674242	11782912	+	3491	3491	RefSeq
hsa-miR-181a-3p	chr1	198828198	198828219	-	3486	3486	miRNA
5S_copy455	chr14	92270233	92270316	-	3476	3476	rRNA
hsa-miR-18a-5p	chr13	92003010	92003032	+	3450	3450	miRNA
piR-37523	chr13	92003010	92003036	+	3450	3450	piRNA
piR-37524	chr13	92003010	92003038	+	3450	3450	piRNA
piR-37525	chr13	92003010	92003039	+	3450	3450	piRNA
U21	chr1	93302846	93302940	+	3447	3447	CDBox
TENM4	chr11	78364328	79151695	-	3445	3445	RefSeq
hsa-miR-181d	chr19	13985724	13985746	+	3438	3438	miRNA
hsa-mir-181d	chr19	13985689	13985825	+	3438	3438	miRNA
ZNF842	chrUn_gl000223	42780	68787	-	3438	3438	RefSeq_antisense
ZNF84:copy21	chr12	133613878	133639885	+	3438	3438	RefSeq_antisense
chr6.tRNA144-AspGTC	chr6	27551236	27551307	-	3427	3427	tRNA
5S_copy421	chr12	133624127	133624211	-	3417	3417	rRNA
5S_copy561	chrUn_gl000223	58454	58538	+	3417	3417	rRNA
EMC101	chr19	50979736	50986608	+	3404	3404	RefSeq_antisense
LSU-rRNA_Hsa_copy208	chr21	15456973	15457500	-	3400	3400	rRNA
piR-31638	chr11	10531724	10531755	-	3372	3372	piRNA
piR-31637	chr11	10531730	10531755	-	3364	3364	piRNA
CDH131	chr16	82660399	83830215	+	3354	3354	RefSeq_antisense
CSMD1	chr8	2792875	4852328	-	3307	3307	RefSeq
U27	chr11	62622484	62622555	-	3271	3271	CDBox
NBPF10	chr1	145293371	146466121	+	3267	3267	RefSeq
Metazoa_SRP:RF00017.91	chr2	11724899	11725173	+	3264	3264	rfam
RMRP	chr9	35657748	35658015	-	3261	3261	other_ncRNA
RNase_MRP:RF00030.1	chr9	35657751	35658014	-	3261	3261	rfam
LSU-rRNA_Hsa_copy68	chr5	65425080	65425229	-	3234	3234	rRNA
chr17.tRNA2-LysTTT	chr17	8022473	8022545	+	3234	3234	tRNA
chr1.tRNA54-LysTTT	chr1	204475655	204475727	+	3231	3231	tRNA
chr1.tRNA62-LysTTT	chr1	204476158	204476230	-	3229	3229	tRNA
chr11.tRNA14-LysTTT	chr11	59327808	59327880	-	3228	3228	tRNA
chr6.tRNA76-LysTTT	chr6	28918806	28918878	+	3227	3227	tRNA
tRNA-Lys-AAA_copy16	chr6_cox_hap2	437542	437614	+	3227	3227	tRNA_like
tRNA-Lys-AAA_copy19	chr6_mcf_hap5	222359	222431	+	3227	3227	tRNA_like
tRNA-Lys-AAA_copy21	chr6_qbl_hap6	222206	222278	+	3227	3227	tRNA_like
tRNA-Lys-AAA_copy23	chr6_mann_hap4	222211	222283	+	3227	3227	tRNA_like
tRNA-Lys-AAA_copy27	chr6_ssto_hap7	259713	259785	+	3227	3227	tRNA_like
hsa-mir-1-2	chr18	19408965	19409049	-	3216	3216	miRNA
chr11.tRNA5-LysTTT	chr11	59323902	59323974	+	3197	3197	tRNA
hsa-mir-1-1	chr20	61151513	61151583	+	3191	3191	miRNA
hsa-miR-1	chr18	19408976	19408997	-	3188	3188	miRNA
hsa-mir-15b	chr3	160122376	160122473	+	3188	3188	miRNA
LSU-rRNA_Hsa_copy152	chr12	34372608	34372741	-	3185	3185	rRNA
SYNE1	chr6	152442819	152958534	-	3168	3168	RefSeq
FAM73A	chr1	78245309	78345225	+	3133	3133	RefSeq
GOT2	chr16	58741035	58768246	-	3121	3121	RefSeq
GREB11	chr2	11674242	11782912	+	3120	3120	RefSeq_antisense
RAB311	chr18	9708228	9862553	+	3114	3114	RefSeq_antisense
Y_RNA:RF00019.722	chr16	58762504	58762581	-	3096	3096	rfam
5S_copy529	chr19	58874865	58874939	+	3094	3094	rRNA
chr14.tRNA13-LysCTT	chr14	58706613	58706685	-	3089	3089	tRNA
5S_copy66	chr2	11701791	11701905	-	3084	3084	rRNA
chr15.tRNA2-LysCTT	chr15	79152904	79152976	+	3082	3082	tRNA
PPM1H	chr12	63037763	63328665	-	3068	3068	RefSeq
5S_copy12	chr1	78245583	78245672	+	3058	3058	rRNA
5S_copy211	chr6	106897254	106897338	+	3058	3058	rRNA
ANKRD281	chr3	15708744	15901053	-	3052	3052	RefSeq_antisense
linc-IFT74-4	chr9	24046212	24146893	+	3038	3038	lincRNA
C1orf213	chr1	23695464	23698330	+	3030	3030	other_ncRNA
LRRC4C	chr11	40135751	41481186	-	3029	3029	other_ncRNA
Y_RNA:RF00019.7	chr1	23696747	23696839	+	3029	3029	rfam
hsa-miR-140-3p	chr16	69967045	69967065	+	2998	2998	miRNA
ADAMTS141	chr10	72432559	72522195	+	2998	2998	RefSeq_antisense
SMAD9	chr13	37418968	37494409	-	2991	2991	RefSeq
Metazoa_SRP:RF00017.166	chr3	15780022	15780316	+	2962	2962	rfam
piR-32148	chrM	694	720	+	2951	2951	piRNA
SEC14L21	chr22	30792930	30821291	+	2947	2947	RefSeq_antisense
HBII-336	chr7	22896232	22896305	+	2924	2924	CDBox
chr16.tRNA10-LysCTT	chr16	3241501	3241573	+	2913	2913	tRNA
BTRC1	chr10	103113790	103317078	+	2900	2900	RefSeq_antisense
chr2.tRNA20-GluTTC	chr2	131094701	131094772	-	2886	2886	tRNA
chr13.tRNA5-GluTTC	chr13	41634874	41634945	-	2876	2876	tRNA
TENM41	chr11	78364328	79151695	-	2865	2865	RefSeq_antisense
CALD11	chr7	134464164	134655480	+	2849	2849	RefSeq_antisense
TMX11	chr14	51706886	51724372	+	2848	2848	RefSeq_antisense
HGSNAT	chr8	42995592	43057970	+	2845	2845	RefSeq
Y_RNA:RF00019.646	chr14	51720651	51720741	-	2844	2844	rfam
piR-36741	chr2	149639390	149639420	-	2827	2827	piRNA
ANKS1B	chr12	99128569	100378432	-	2821	2821	RefSeq
GPC5	chr13	92050935	93519487	+	2817	2817	RefSeq
5S_copy331	chrX	131072895	131072983	-	2814	2814	rRNA
MACF1	chr1	39549839	39952810	+	2812	2812	RefSeq
RPL21	chr13	27825692	27830702	+	2812	2812	RefSeq
SYN3	chr22	32908540	33454377	-	2812	2812	RefSeq
VSTM4	chr10	50222333	50323559	-	2807	2807	RefSeq
5S_copy444	chr14	20883146	20883235	+	2800	2800	rRNA
hsa-mir-181c	chr19	13985513	13985622	+	2797	2797	miRNA
LYN1	chr8	56792386	56925006	+	2797	2797	RefSeq_antisense
U2:RF00004.59	chr10	103124602	103124792	-	2792	2792	rfam
Y_RNA:RF00019.413	chr8	43008119	43008197	+	2788	2788	rfam
CALD1:copy21	chr7	134576151	134655480	+	2782	2782	RefSeq_antisense
SNHG16	chr17	74553846	74561430	+	2778	2778	other_ncRNA
piR-54907	chr7	22896232	22896258	+	2765	2765	piRNA
TOP2A	chr17	38544773	38574202	-	2760	2760	RefSeq
NT5DC11	chr6	116421999	116566853	+	2759	2759	RefSeq_antisense
Y_RNA:RF00019.844	chr22	41461558	41461650	-	2754	2754	rfam
hsa-mir-130b	chr22	22007593	22007674	+	2746	2746	miRNA
GTF2IRD11	chr7	73868120	74016920	+	2742	2742	RefSeq_antisense
FBXL7	chr5	15500305	15939905	+	2739	2739	RefSeq
OPCML1	chr11	132284875	133402403	-	2737	2737	RefSeq_antisense
U1:RF00003.69	chr5	103434575	103434739	+	2733	2733	rfam
PHACTR11	chr6	12717037	13288075	+	2731	2731	RefSeq_antisense
NCKAP51	chr2	133429372	134326031	-	2720	2720	RefSeq_antisense
LTBP1	chr2	33172369	33624575	+	2719	2719	RefSeq
U102	chr13	27829201	27829272	+	2713	2713	CDBox
PCDH9	chr13	66876966	67804468	-	2713	2713	RefSeq
PTBP31	chr9	114979995	115095944	-	2710	2710	RefSeq_antisense
Y_RNA:RF00019.746	chr17	38547484	38547590	-	2706	2706	rfam
DOCK8	chr9	214865	465259	+	2699	2699	RefSeq
hsa-miR-181c-5p	chr19	13985539	13985560	+	2687	2687	miRNA
5S_copy309	chr9	115014538	115014627	+	2667	2667	rRNA
hsa-miR-130b-3p	chr22	22007643	22007664	+	2660	2660	miRNA
LSU-rRNA_Hsa_copy151	chr12	34372316	34372605	-	2657	2657	rRNA
snR38B	chr17	74557190	74557275	+	2639	2639	CDBox
snoR38:RF00213.2	chr17	74557191	74557274	+	2639	2639	rfam
hsa-miR-15b-5p	chr3	160122395	160122416	+	2637	2637	miRNA
RAB3B1	chr1	52373628	52456436	-	2631	2631	RefSeq_antisense
U43	chr22	39715057	39715118	-	2615	2615	CDBox
MFSD81	chr4	128838960	128887139	-	2615	2615	RefSeq_antisense
WDR43	chr2	29117533	29171080	+	2597	2597	RefSeq
DOCK8:copy2	chr9	273048	465259	+	2594	2594	RefSeq
LSU-rRNA_Hsa_copy2	chr1	25483509	25483621	-	2588	2588	rRNA
5S_copy8	chr1	52439083	52439177	+	2586	2586	rRNA
LSU-rRNA_Hsa_copy180	chr17	33478276	33478372	-	2583	2583	rRNA
piR-61919	chr17	74557242	74557268	+	2575	2575	piRNA
CHM	chrX	85116185	85302566	-	2572	2572	RefSeq
MNAT1	chr14	61201459	61435398	+	2562	2562	RefSeq
tRNA-Gly-GGY_copy21	chr19	8793667	8793703	-	2555	2555	tRNA_like
PRKCA	chr17	64298926	64806862	+	2543	2543	RefSeq
MAPK16	chr22	22113947	22221970	-	2534	2534	RefSeq_antisense
MAPK1:copy21	chr22	22123319	22221970	-	2528	2528	RefSeq_antisense
SORCS1	chr10	108333421	108924466	-	2512	2512	RefSeq
piR-30799	chr22	39715057	39715084	-	2510	2510	piRNA
COL4A31	chr2	228029281	228179508	+	2503	2503	RefSeq_antisense
RNU11	chr1	28975112	28975246	+	2502	2502	other_ncRNA
USMG5	chr10	105148809	105156270	-	2493	2493	RefSeq
ARHGAP42	chr11	100558407	100861656	+	2486	2486	RefSeq
NVL	chr1	224415036	224517891	-	2483	2483	RefSeq
hsa-mir-1307	chr10	105154010	105154158	-	2480	2480	miRNA
ZMIZ1	chr10	80828792	81076285	+	2476	2476	RefSeq
E2F31	chr6	20402137	20493945	+	2475	2475	RefSeq_antisense
E2F3:copy21	chr6	20403910	20493945	+	2475	2475	RefSeq_antisense
5S_copy215	chr6	116499410	116499496	-	2473	2473	rRNA
5S_copy243	chr7	74011129	74011218	-	2473	2473	rRNA
SNRPB	chr20	2442281	2451499	-	2472	2472	RefSeq
5S_copy68	chr2	22561758	22561875	-	2470	2470	rRNA
SNORD119	chr20	2443605	2443686	-	2457	2457	CDBox
ELF5	chr11	34500342	34535347	-	2455	2455	RefSeq
C14orf371	chr14	58470808	58618847	-	2437	2437	RefSeq_antisense
CSMD11	chr8	2792875	4852328	-	2435	2435	RefSeq_antisense
LSU-rRNA_Hsa_copy53	chr4	70296582	70296753	-	2432	2432	rRNA
Metazoa_SRP:RF00017.299	chr6	20421814	20422118	-	2431	2431	rfam
FOXK2	chr17	80477594	80562483	+	2430	2430	RefSeq
LEO11	chr15	52230222	52263958	-	2428	2428	RefSeq_antisense
DGKH1	chr13	42614172	42803891	+	2423	2423	RefSeq_antisense
DGKH:copy21	chr13	42622843	42803891	+	2422	2422	RefSeq_antisense
REXO11	chr19	1815245	1848452	-	2416	2416	RefSeq_antisense
SYNPR	chr3	63263914	63602597	+	2409	2409	RefSeq
5S_copy554	chr22	33031096	33031184	-	2407	2407	rRNA
GRM5	chr11	88237744	88796816	-	2397	2397	RefSeq
WNT9B1	chr17	44928968	44954437	+	2377	2377	RefSeq_antisense
hsa-mir-941-1	chr20	62550778	62550894	+	2367	2367	miRNA
ANKS1B:copy2	chr12	99137752	99548868	-	2367	2367	RefSeq
NCL	chr2	232319459	232329205	-	2366	2366	RefSeq
U33	chr19	49993874	49993956	+	2365	2365	CDBox
SIM11	chr6	100836750	100911551	-	2349	2349	RefSeq_antisense
LSU-rRNA_Hsa_copy118	chrX	88735819	88735906	+	2347	2347	rRNA
LSU-rRNA_Hsa_copy124	chrY	3005051	3005141	+	2347	2347	rRNA
U18A	chr15	66795583	66795652	-	2346	2346	CDBox
KIAA1731	chr11	93394816	93463522	+	2346	2346	RefSeq
FER	chr5	108083523	108523373	+	2341	2341	RefSeq
EFCAB11	chr14	90263469	90421089	-	2340	2340	RefSeq
hsa-miR-941	chr20	62550848	62550870	+	2328	2328	miRNA
ABCA131	chr7	48211057	48687091	+	2327	2327	RefSeq_antisense
COL26A1	chr7	101006101	101202304	+	2325	2325	RefSeq
RPL7A	chr9	136215069	136218280	+	2325	2325	RefSeq
STK32	chr8	99466859	99954799	-	2308	2308	RefSeq_antisense
ANKRD63	chr15	40573645	40574787	-	2301	2301	RefSeq_antisense
5S_copy279	chr8	60368444	60368533	+	2289	2289	rRNA
TBCD1	chr17	80709940	80901062	+	2286	2286	RefSeq_antisense
LINC00910	chr17	41447213	41466266	-	2283	2283	other_ncRNA
Metazoa_SRP:RF00017.193	chr3	113351551	113351845	+	2279	2279	rfam
LINC00910:copy2	chr17	41453296	41466266	-	2277	2277	other_ncRNA
CD74	chr5	149781200	149792499	-	2277	2277	RefSeq
SSU-rRNA_Hsa_copy27	chr14	90341371	90341573	-	2270	2270	rRNA
piR-36494	chr17	74557195	74557226	+	2267	2267	piRNA
U2:RF00004.77	chr17	41464594	41464785	-	2265	2265	rfam
BBS21	chr16	56518259	56554008	-	2247	2247	RefSeq_antisense
YWHAQ1	chr2	9724096	9771184	-	2246	2246	RefSeq_antisense
TMEM107	chr17	8076297	8079714	-	2237	2237	RefSeq
U8	chr17	8076771	8076906	-	2236	2236	CDBox
U8:RF00096.20	chr17	8076772	8076905	-	2236	2236	rfam
CLASP11	chr2	122095352	122407052	-	2228	2228	RefSeq_antisense
COL4A61	chrX	107398837	107682704	-	2218	2218	RefSeq_antisense
5S_copy42	chr1	228743494	228743604	+	2218	2218	rRNA
RBMX	chrX	135951353	135962939	-	2217	2217	RefSeq
linc-TGIF2LY-2	chrY	2870953	2970313	+	2210	2210	lincRNA
ZFPM2	chr8	106331147	106816767	+	2209	2209	RefSeq
SPIDR1	chr8	48173489	48648563	+	2203	2203	RefSeq_antisense
U61	chrX	135961358	135961430	-	2201	2201	CDBox
SART3	chr12	108915991	108955165	-	2201	2201	RefSeq
SLC1A51	chr19	47278140	47291842	-	2196	2196	RefSeq_antisense
5S_copy405	chr12	99477594	99477682	-	2190	2190	rRNA
SLC27A61	chr5	128301210	128369335	+	2176	2176	RefSeq_antisense
LSU-rRNA_Hsa_copy148	chr11	111692116	111692362	-	2172	2172	rRNA
5S_copy456	chr14	103783284	103783373	-	2169	2169	rRNA
ADAMTSL11	chr9	18474079	18910947	+	2162	2162	RefSeq_antisense
CAMSAP3	chr19	7660788	7683196	+	2161	2161	RefSeq
hsa-mir-421	chrX	73438212	73438296	-	2160	2160	miRNA
LOC340357	chr8	12623571	12668910	-	2158	2158	other_ncRNA
5S_copy82	chr2	81723362	81723451	-	2157	2157	rRNA
linc-TRIM7-1:antisense	chr5	180634462	180644800	-	2155	2155	lincRNA_antisense
LSU-rRNA_Hsa_copy103	chr8	56821654	56822036	-	2155	2155	rRNA
U50	chr6	86387012	86387086	-	2153	2153	CDBox
hsa-miR-421	chrX	73438227	73438249	-	2151	2151	miRNA
KIAA1211L	chr2	99410309	99552684	-	2150	2150	RefSeq
PLCH11	chr3	155197671	155421997	-	2144	2144	RefSeq_antisense
EEF2	chr19	3976054	3985461	-	2140	2140	RefSeq
NAV31	chr12	78225069	78606790	+	2135	2135	RefSeq_antisense
SORCS11	chr10	108333421	108924466	-	2135	2135	RefSeq_antisense
chr5.tRNA9-LysCTT	chr5	180634755	180634827	+	2132	2132	tRNA
chr1.tRNA119-LysCTT	chr1	145395522	145395594	-	2131	2131	tRNA
ZBTB11	chr3	101368283	101395988	-	2130	2130	RefSeq
PLCG21	chr16	81812899	81991899	+	2130	2130	RefSeq_antisense
chr6.tRNA13-LysCTT	chr6	26556774	26556846	+	2130	2130	tRNA
Y_RNA:RF00019.87	chr2	9755396	9755502	+	2127	2127	rfam
chr16.tRNA7-LysCTT	chr16	3225692	3225764	+	2117	2117	tRNA
chr5.tRNA11-LysCTT	chr5	180648979	180649051	-	2117	2117	tRNA
hsa-mir-361	chrX	85158641	85158712	-	2106	2106	miRNA
Y_RNA:RF00019.180	chr3	101380904	101381008	-	2103	2103	rfam
LRP1B1	chr2	140988996	142889270	-	2090	2090	RefSeq_antisense
Y_RNA:RF00019.362	chr7	43136331	43136443	+	2070	2070	rfam
FAM53A	chr4	1641608	1685988	-	2065	2065	RefSeq
LSU-rRNA_Hsa_copy175	chr16	81901993	81902316	-	2064	2064	rRNA
PDE4D	chr5	58264866	59783925	-	2062	2062	RefSeq
Y_RNA:RF00019.480	chr10	36914943	36915066	-	2062	2062	rfam
CAMTA1	chr1	6845384	7829766	+	2054	2054	RefSeq
SAMD4A1	chr14	55034330	55260033	+	2050	2050	RefSeq_antisense
UBE2R2	chr9	33817182	33920401	+	2042	2042	RefSeq
Y_RNA:RF00019.747	chr17	41084865	41084959	-	2041	2041	rfam
hsa-miR-23b-3p	chr9	97847547	97847567	+	2036	2036	miRNA
hsa-mir-23b	chr9	97847490	97847586	+	2036	2036	miRNA
Y_RNA:RF00019.209	chr4	1685147	1685256	-	2030	2030	rfam
U5:RF00020.29	chr15	65597015	65597130	+	2029	2029	rfam
U24	chr9	136216251	136216325	+	2019	2019	CDBox
Y_RNA:RF00019.283	chr5	108227138	108227247	+	2019	2019	rfam
Y_RNA:RF00019.4	chr1	11059919	11060002	-	2013	2013	rfam
Y_RNA:RF00019.541	chr11	93452769	93452881	+	2013	2013	rfam
HIP11	chr7	75162619	75368283	-	2005	2005	RefSeq_antisense
SCFD21	chr4	53739151	54232242	-	2005	2005	RefSeq_antisense
linc-TMEM17	chr2	62801491	62858701	-	2004	2004	lincRNA
piR-52729	chr9	136216274	136216300	+	2004	2004	piRNA
GPC51	chr13	92050935	93519487	+	1997	1997	RefSeq_antisense
VAPA	chr18	9913955	9960018	+	1992	1992	RefSeq
ACOX31	chr4	8368009	8442452	-	1992	1992	RefSeq_antisense
5S_copy80	chr2	74195245	74195332	-	1984	1984	rRNA
MET1	chr7	116312459	116438440	+	1981	1981	RefSeq_antisense
5S_copy141	chr4	8394742	8394853	+	1973	1973	rRNA
FAM155A1	chr13	107820879	108519460	-	1968	1968	RefSeq_antisense
5S_copy501	chr17	64263861	64263949	+	1968	1968	rRNA
Metazoa_SRP:RF00017.168	chr3	33144500	33144798	+	1966	1966	rfam
hsa-mir-22	chr17	1617197	1617281	-	1965	1965	miRNA
OXR1	chr8	107282406	107764921	+	1965	1965	RefSeq
CSMD21	chr1	33979609	34631443	-	1963	1963	RefSeq_antisense
5S_copy507	chr18	9923916	9923999	+	1962	1962	rRNA
tRNA-Glu-GAG__copy10	chr3	155378882	155378918	+	1961	1961	tRNA_like
PWWP2B	chr10	134210702	134231358	+	1953	1953	RefSeq
LSU-rRNA_Hsa_copy125	chrY	19691914	19692439	-	1944	1944	rRNA
LSU-rRNA_Hsa_copy127	chrY	20487334	20487859	+	1944	1944	rRNA
PPP4R2	chr3	73046119	73115011	+	1939	1939	RefSeq
SOX2-OT	chr3	180774468	181460013	+	1936	1936	other_ncRNA
hsa-miR-22-3p	chr17	1617208	1617229	-	1935	1935	miRNA
ANKRD1	chr10	92671857	92681032	-	1935	1935	RefSeq
hsa-miR-425-3p	chr3	49057592	49057613	-	1931	1931	miRNA
hsa-mir-374a	chrX	73507121	73507192	-	1928	1928	miRNA
GPHN	chr14	66974125	67648525	+	1926	1926	RefSeq
RNU4ATAC	chr2	122288456	122288585	+	1923	1923	other_ncRNA
U4atac:RF00618.3	chr2	122288457	122288583	+	1923	1923	rfam
SOX51	chr12	23685231	24715383	-	1920	1920	RefSeq_antisense
FRS21	chr12	69864129	69973571	+	1915	1915	RefSeq_antisense
Metazoa_SRP:RF00017.623	chr14	103049225	103049514	-	1906	1906	rfam
ZNF5211	chr18	22641888	22932214	-	1903	1903	RefSeq_antisense
SOX2-OT:copy2	chr3	180892932	181460013	+	1897	1897	other_ncRNA
USP13	chr3	179370933	179507189	+	1889	1889	RefSeq
U4atac:RF00618.13	chr11	122322182	122322307	+	1875	1875	rfam
U4atac:RF00618.12	chr11	122319918	122320039	+	1873	1873	rfam
U4atac:RF00618.10	chr9	33868538	33868663	+	1869	1869	rfam
U4atac:RF00618.5	chr4	73830895	73831020	+	1869	1869	rfam
U4atac:RF00618.6	chr5	112829532	112829657	+	1869	1869	rfam
GRIK2	chr6	101846861	102517958	+	1856	1856	RefSeq
hsa-mir-29c	chr1	207975197	207975284	-	1855	1855	miRNA
U7:RF00066.49	chr3	73076959	73077024	+	1854	1854	rfam
U80	chr1	173833967	173834044	-	1846	1846	CDBox
snosnR60_Z15:RF00309.1	chr1	173833965	173834046	-	1846	1846	rfam
KIF5C	chr2	149632792	149883273	+	1844	1844	RefSeq
NAV2	chr11	19372271	20143147	+	1841	1841	RefSeq
Y_RNA:RF00019.403	chr7	148680847	148680948	+	1837	1837	rfam
TTC34	chr1	2572807	2706230	-	1834	1834	RefSeq
LIN521	chr14	74551656	74667117	+	1832	1832	RefSeq_antisense
hsa-miR-29c-3p	chr1	207975210	207975231	-	1823	1823	miRNA
PHKB	chr16	47495210	47735434	+	1814	1814	RefSeq
SYNPR:copy2	chr3	63428753	63602597	+	1809	1809	RefSeq
PRKCA1	chr17	64298926	64806862	+	1809	1809	RefSeq_antisense
PLXDC21	chr10	20105372	20569115	+	1808	1808	RefSeq_antisense
LSU-rRNA_Hsa_copy51	chr3	179497344	179497506	+	1808	1808	rRNA
SYNPR-AS1:antisense	chr3	63409272	63535727	-	1802	1802	other_ncRNA_antisense
tRNA-Sec:RF01852.1	chr19	45981860	45981945	-	1801	1801	rfam
chr19.tRNA8-SeCTCA	chr19	45981860	45981945	-	1801	1801	tRNA
U37	chr19	3982505	3982570	-	1794	1794	CDBox
MEF2D	chr1	156433513	156470634	-	1777	1777	RefSeq
5S_copy119	chr3	63531116	63531196	+	1774	1774	rRNA
PKHD11	chr6	51480145	51952423	-	1773	1773	RefSeq_antisense
SDK11	chr7	3341080	4308631	+	1771	1771	RefSeq_antisense
ZFYVE91	chr1	52607766	52812358	+	1771	1771	RefSeq_antisense
COL28A11	chr7	7398244	7575460	-	1765	1765	RefSeq_antisense
5S_copy2	chr1	34578551	34578639	+	1765	1765	rRNA
CUX1	chr7	101459184	101927250	+	1761	1761	RefSeq
NRXN3:antisense	chr14	78636716	80334633	+	1757	1757	other_ncRNA_antisense
Metazoa_SRP:RF00017.345	chr7	66445107	66445397	+	1753	1753	rfam
FBXL131	chr7	102453308	102715288	-	1750	1750	RefSeq_antisense
ERICH1-AS1:antisense	chr8	687587	1087777	+	1749	1749	other_ncRNA_antisense
UBE2E2	chr3	23244784	23632296	+	1738	1738	RefSeq
5S_copy154	chr4	131427824	131427930	-	1735	1735	rRNA
CUX1:copy2	chr7	101460882	101901513	+	1732	1732	RefSeq
linc-AMMECR1	chrX	109700008	109839249	-	1726	1726	lincRNA
DIP2B	chr12	50898768	51142450	+	1725	1725	RefSeq
Metazoa_SRP:RF00017.204	chr3	152917489	152917806	-	1712	1712	rfam
PTPRT	chr20	40701392	41818557	-	1710	1710	RefSeq
PKHD1:copy21	chr6	51585647	51952423	-	1708	1708	RefSeq_antisense
hsa-mir-320a	chr8	22102475	22102556	-	1706	1706	miRNA
hsa-miR-320a	chr8	22102488	22102509	-	1703	1703	miRNA
5S_copy363	chr10	108729780	108729868	+	1703	1703	rRNA
linc-GPR65-6:copy2:antisense	chr14	86400965	86596295	+	1701	1701	lincRNA_antisense
USP9X1	chrX	40944888	41095832	+	1700	1700	RefSeq_antisense
DLG2	chr11	83166056	85338314	-	1695	1695	RefSeq
SGPL1	chr10	72575704	72640932	+	1694	1694	RefSeq
Y_RNA:RF00019.515	chr11	3686394	3686489	-	1690	1690	rfam
TFDP1	chr13	114239003	114295788	+	1681	1681	other_ncRNA
LSU-rRNA_Hsa_copy15	chr1	169878692	169878920	-	1681	1681	rRNA
RYR21	chr1	237205702	237997288	+	1680	1680	RefSeq_antisense
linc-GPR65-6:antisense	chr14	86378385	86537310	+	1666	1666	lincRNA_antisense
TUBGCP21	chr10	135092134	135125841	-	1658	1658	RefSeq_antisense
CDK7	chr5	68530622	68573257	+	1654	1654	RefSeq
LSU-rRNA_Hsa_copy173	chr16	47538630	47539297	+	1650	1650	rRNA
ZFAS1	chr20	47894715	47905795	+	1647	1647	other_ncRNA
linc-ZNF366-5:antisense	chr5	71817327	71956514	-	1641	1641	lincRNA_antisense
U74	chr1	173836812	173836883	-	1634	1634	CDBox
C11orf80	chr11	66512207	66610987	+	1621	1621	other_ncRNA
U1:RF00003.103	chr12	63244518	63244681	-	1620	1620	rfam
linc-ARSJ:antisense	chr4	115233102	115286107	-	1614	1614	lincRNA_antisense
NRXN3	chr14	78636716	80334633	+	1610	1610	other_ncRNA
SF3B3	chr16	70557691	70611571	+	1609	1609	RefSeq
linc-ARSJ:copy2:antisense	chr4	115255874	115286113	-	1608	1608	lincRNA_antisense
chr1.tRNA70-GlyTCC	chr1	161439547	161439618	-	1608	1608	tRNA
chr1.tRNA73-GlyTCC	chr1	161432166	161432237	-	1608	1608	tRNA
chr1.tRNA76-GlyTCC	chr1	161424756	161424827	-	1608	1608	tRNA
chr1.tRNA79-GlyTCC	chr1	161417375	161417446	-	1608	1608	tRNA
AGBL11	chr15	86685242	87572283	+	1596	1596	RefSeq_antisense
LSU-rRNA_Hsa_copy99	chr8	46951571	46952097	-	1589	1589	rRNA
chr1.tRNA117-GlyTCC	chr1	145397864	145397935	-	1583	1583	tRNA
chr1.tRNA45-GlyTCC	chr1	161500903	161500974	+	1583	1583	tRNA
Metazoa_SRP:RF00017.407	chr8	120874902	120875196	+	1572	1572	rfam
BCAS31	chr17	58755172	59470199	+	1563	1563	RefSeq_antisense
TPR1	chr1	186280786	186344457	-	1559	1559	RefSeq_antisense
KIAA1704	chr13	45563687	45602404	+	1554	1554	RefSeq
hsa-let-7b	chr22	46509566	46509648	+	1547	1547	miRNA
let-7:RF00027.12	chr22	46509565	46509649	+	1547	1547	rfam
LRRC40	chr1	70610485	70671361	-	1546	1546	RefSeq
hsa-let-7b-5p	chr22	46509571	46509592	+	1545	1545	miRNA
CYTH3	chr7	6201412	6312242	-	1545	1545	RefSeq
piR-31531	chr1	45244100	45244127	+	1540	1540	piRNA
hsa-miR-378c	chr10	132760897	132760921	-	1538	1538	miRNA
hsa-mir-378c	chr10	132760851	132760931	-	1538	1538	miRNA
Metazoa_SRP:RF00017.579	chr13	45576285	45576582	+	1535	1535	rfam
WWOX1	chr16	78133327	79246564	+	1534	1534	RefSeq_antisense
5S_copy35	chr1	186341760	186341849	+	1534	1534	rRNA
U18C	chr15	66793590	66793656	-	1531	1531	CDBox
Y_RNA:RF00019.334	chr6	100090113	100090223	-	1526	1526	rfam
hsa-miR-423-5p	chr17	28444113	28444135	+	1522	1522	miRNA
EEF1A1	chr6	74225473	74230755	-	1519	1519	RefSeq
LOC729732:antisense	chr8	12394588	12523120	-	1518	1518	other_ncRNA_antisense
Y_RNA:RF00019.571	chr12	51137351	51137467	+	1508	1508	rfam
RPS3A	chr4	152020725	152025804	+	1501	1501	RefSeq
THAP41	chr2	242523820	242576725	-	1501	1501	RefSeq_antisense
GRM7	chr3	6902802	7783218	+	1498	1498	RefSeq
LHFPL11	chrX	111873879	111923375	-	1498	1498	RefSeq_antisense
MIR205HG	chr1	209602168	209605892	+	1496	1496	RefSeq
R3HDM1	chr2	136289083	136482839	+	1493	1493	RefSeq
hsa-miR-205-5p	chr1	209605511	209605532	+	1491	1491	miRNA
hsa-mir-205	chr1	209605478	209605587	+	1491	1491	miRNA
KIF16B1	chr20	16252749	16554079	-	1488	1488	RefSeq_antisense
Metazoa_SRP:RF00017.47	chr1	70645827	70646123	-	1487	1487	rfam
MPP5	chr14	67708012	67802778	+	1484	1484	RefSeq
Y_RNA:RF00019.884	chrX	111904885	111904996	+	1483	1483	rfam
NXF2	chrX	101615316	101694929	-	1482	1482	RefSeq
NXF2B	chrX	101502094	101581634	+	1482	1482	RefSeq
DPY19L11	chr7	34968493	35077653	-	1481	1481	RefSeq_antisense
SSU-rRNA_Hsa_copy14	chr7	80962908	80963147	+	1478	1478	rRNA
U1:RF00003.1	chr1	7279420	7279584	+	1477	1477	rfam
PDE11A1	chr2	178487977	178973066	-	1471	1471	RefSeq_antisense
HBII-82B	chr16	70563412	70563498	+	1470	1470	CDBox
MLLT10	chr10	21823101	22032559	+	1469	1469	RefSeq
MGAT5B	chr17	74864798	74946471	+	1467	1467	RefSeq
5S_copy106	chr2	242524383	242524472	+	1464	1464	rRNA
tRNA-Gly-GGG_copy22	chr4	101689729	101689785	+	1464	1464	tRNA_like
hsa-mir-30a	chr6	72113254	72113324	-	1461	1461	miRNA
CDH41	chr20	59827482	60515673	+	1459	1459	RefSeq_antisense
5S_copy62	chr1	230955996	230956106	+	1458	1458	rRNA
NRXN3:copy2	chr14	78870074	80334633	+	1457	1457	RefSeq
RPS6KA5	chr14	91337167	91526993	-	1453	1453	RefSeq
Metazoa_SRP:RF00017.780	chr18	68179963	68180244	+	1452	1452	rfam
U20	chr2	232321155	232321234	-	1449	1449	CDBox
RPS6KA5:copy2	chr14	91360319	91526993	-	1445	1445	RefSeq
AFF2	chrX	147582139	148082193	+	1444	1444	RefSeq
hsa-miR-30a-3p	chr6	72113257	72113278	-	1442	1442	miRNA
TSC11	chr9	135766735	135820020	-	1440	1440	RefSeq_antisense
piR-54381	chr2	232321209	232321234	-	1438	1438	piRNA
U53	chr2	29149933	29150010	+	1432	1432	CDBox
ADAMTS16	chr5	5140443	5320412	+	1425	1425	RefSeq
FSTL51	chr4	162305044	163085186	-	1424	1424	RefSeq_antisense
LOC100188947:antisense	chr10	93066719	93371217	-	1423	1423	other_ncRNA_antisense
DMD1	chrX	31137345	33357726	-	1423	1423	RefSeq_antisense
RANBP3L	chr5	36249104	36302011	-	1420	1420	RefSeq
tRNA-Gly-GGA_copy41	chr7	35060765	35060802	+	1420	1420	tRNA_like
tRNA-Gly-GGA_copy54	chr9	135806884	135806921	+	1420	1420	tRNA_like
Y_RNA:RF00019.107	chr2	85661630	85661742	+	1417	1417	rfam
tRNA-Gly-GGA_copy84	chr17	74884893	74884929	+	1417	1417	tRNA_like
STPG21	chr4	98480025	99064391	-	1414	1414	RefSeq_antisense
CCSER11	chr4	91048684	92523370	+	1413	1413	RefSeq_antisense
FOXM11	chr12	2966847	2986321	-	1413	1413	RefSeq_antisense
LOC100616530:antisense	chr8	96281064	96822371	+	1412	1412	other_ncRNA_antisense
NBPF14	chr1	148250249	148346929	-	1412	1412	RefSeq
5S_copy449	chr14	67726944	67727031	+	1412	1412	rRNA
HSPA8	chr11	122928200	122932901	-	1409	1409	RefSeq
ATP6V0D21	chr8	87111139	87166454	+	1409	1409	RefSeq_antisense
CNTNAP21	chr7	145813453	148118088	+	1407	1407	RefSeq_antisense
2018-03-01	chr4	164445450	165304407	-	1406	1406	RefSeq
C19orf181	chr19	58469805	58485902	-	1406	1406	RefSeq_antisense
ADAM101	chr15	58888510	59042177	-	1404	1404	RefSeq_antisense
PTK21	chr8	141668481	142011412	-	1404	1404	RefSeq_antisense
ARL15	chr5	53180614	53606403	-	1400	1400	RefSeq
Y_RNA:RF00019.551	chr12	2969115	2969199	+	1400	1400	rfam
linc-ITGA4-1:copy2:antisense	chr2	181988562	182264280	+	1399	1399	lincRNA_antisense
tRNA-Gly-GGA_copy90	chr19	58472364	58472398	+	1399	1399	tRNA_like
LARS21	chr3	45430075	45590328	+	1397	1397	RefSeq_antisense
hsa-miR-361-3p	chrX	85158646	85158668	-	1392	1392	miRNA
AK5	chr1	77747662	78025654	+	1389	1389	RefSeq
KCNH71	chr2	163227917	163695257	-	1388	1388	RefSeq_antisense
Y_RNA:RF00019.786	chr18	43656970	43657065	-	1387	1387	rfam
hsa-mir-128-1	chr2	136422967	136423048	+	1386	1386	miRNA
ZC3H13	chr13	46536314	46626894	-	1381	1381	RefSeq
CDH22	chr20	44802372	44937137	-	1380	1380	RefSeq
EYA4	chr6	133562495	133853258	+	1379	1379	RefSeq
TBC1D5	chr3	17198654	17784240	-	1377	1377	RefSeq
KCNH7:copy21	chr2	163279757	163695257	-	1377	1377	RefSeq_antisense
CDH4:copy21	chr20	60074477	60515673	+	1376	1376	RefSeq_antisense
EFCAB141	chr1	47140831	47184736	-	1370	1370	RefSeq_antisense
U73a	chr4	152024979	152025043	+	1368	1368	CDBox
ANO101	chr3	43407818	43663560	-	1368	1368	RefSeq_antisense
linc-DNAJC19-6:antisense	chr3	181091678	181160296	-	1365	1365	lincRNA_antisense
hsa-miR-1307-5p	chr10	105154098	105154118	-	1365	1365	miRNA
ATP2C21	chr16	84402133	84497793	+	1363	1363	RefSeq_antisense
PCP4	chr21	41239347	41301322	+	1362	1362	RefSeq
TGFBR11	chr9	101867412	101916473	+	1361	1361	RefSeq_antisense
5S_copy303	chr9	101908159	101908247	-	1357	1357	rRNA
ADRA1B1	chr5	159343740	159400017	+	1355	1355	RefSeq_antisense
NRXN3:copy21	chr14	78870074	80334633	+	1345	1345	RefSeq_antisense
QKI	chr6	163835675	163999628	+	1344	1344	RefSeq
EFCAB14-AS1	chr1	47139708	47157769	+	1343	1343	other_ncRNA
TNIK1	chr3	170780292	171178197	-	1343	1343	RefSeq_antisense
NDE1	chr16	15737124	15820208	+	1341	1341	RefSeq
Metazoa_SRP:RF00017.773	chr18	23398198	23398496	-	1338	1338	rfam
hsa-mir-374b	chrX	73438382	73438453	-	1332	1332	miRNA
LSU-rRNA_Hsa_copy42	chr3	45494768	45494852	-	1331	1331	rRNA
MOB3B1	chr9	27325207	27529850	-	1330	1330	RefSeq_antisense
LOC349160	chr7	136583520	136849088	-	1328	1328	other_ncRNA
SPAG16	chr2	214149103	215275225	+	1328	1328	RefSeq
CNTNAP2	chr7	145813453	148118088	+	1326	1326	RefSeq
CDH4:copy31	chr20	60174817	60515673	+	1325	1325	RefSeq_antisense
CDH2	chr18	25530930	25757445	-	1322	1322	RefSeq
chr1.tRNA91-PseudoCCC	chr1	149680210	149680280	-	1316	1316	tRNA
linc-HCCS:antisense	chrX	10210379	10333363	+	1312	1312	lincRNA_antisense
PRKCB	chr16	23847300	24231932	+	1312	1312	RefSeq
ST7	chr7	116593381	116870075	+	1310	1310	RefSeq
chr1.tRNA99-ValCAC	chr1	149294666	149294736	-	1306	1306	tRNA
SCUBE11	chr22	43599229	43739394	-	1305	1305	RefSeq_antisense
DOCK3	chr3	50712672	51421629	+	1304	1304	RefSeq
Y_RNA:RF00019.53	chr1	156453890	156454002	-	1304	1304	rfam
LSU-rRNA_Hsa_copy190	chr19	24182636	24183468	-	1304	1304	rRNA
ERBB41	chr2	212240442	213403352	-	1301	1301	RefSeq_antisense
chr19.tRNA2-GlyTCC	chr19	4724082	4724153	+	1301	1301	tRNA
SNTG2	chr2	946554	1371384	+	1299	1299	RefSeq
LRRC4C:antisense	chr11	40135751	41481186	-	1295	1295	other_ncRNA_antisense
U31	chr11	62620797	62620867	-	1293	1293	CDBox
EFHC21	chrX	44007128	44202923	-	1293	1293	RefSeq_antisense
MAN1A21	chr1	117910085	118068320	+	1289	1289	RefSeq_antisense
IPO8	chr12	30781915	30848929	-	1284	1284	RefSeq
SKIV2L21	chr5	54603576	54721409	+	1278	1278	RefSeq_antisense
linc-ZFHX3-3	chr16	73982488	74028605	-	1273	1273	lincRNA
ZNF727	chr7	63505821	63538927	+	1273	1273	RefSeq
EXOC6B1	chr2	72406444	73053177	-	1270	1270	RefSeq_antisense
linc-SLC7A11-4:antisense	chr4	139741111	139933800	-	1269	1269	lincRNA_antisense
ARPP21:copy2	chr3	35682510	35835988	+	1269	1269	RefSeq
ARPP21:copy3	chr3	35683849	35835988	+	1269	1269	RefSeq
chr6.tRNA15-TyrGTA	chr6	26575798	26575887	+	1267	1267	tRNA
tRNA-Val-GTY_copy15	chrX	10253784	10253820	-	1266	1266	tRNA_like
LINC00534	chr8	91233716	91400187	+	1265	1265	other_ncRNA
ARPP21:copy4	chr3	35721113	35835988	+	1263	1263	RefSeq
CLDN101	chr13	96085853	96232010	+	1262	1262	RefSeq_antisense
CERKL	chr2	182401401	182521834	-	1260	1260	other_ncRNA
HSPA9	chr5	137890571	137911318	-	1258	1258	RefSeq
GOLPH3L	chr1	150618701	150669672	-	1257	1257	RefSeq
STK32C1	chr10	134020996	134121477	-	1254	1254	RefSeq_antisense
MGARP	chr4	140187317	140201492	-	1252	1252	RefSeq
UNC13C1	chr15	54305101	54920806	+	1252	1252	RefSeq_antisense
LSU-rRNA_Hsa_copy212	chr22	22210545	22210651	+	1251	1251	rRNA
chr6.tRNA37-ValAAC	chr6	27203288	27203360	+	1250	1250	tRNA
LOC286189	chr8	69215703	69243726	-	1248	1248	other_ncRNA
UBAC2	chr13	99852679	100038753	+	1248	1248	RefSeq
MAP3K51	chr6	136878187	137113656	-	1248	1248	RefSeq_antisense
NR6A1	chr9	127279554	127533589	-	1247	1247	RefSeq
Y_RNA:RF00019.162	chr3	43513969	43514088	+	1247	1247	rfam
DNAJC5B	chr8	66933791	67012755	+	1246	1246	RefSeq
CFDP11	chr16	75327608	75467387	-	1244	1244	RefSeq_antisense
linc-G2E3-2	chr14	29620347	29636919	+	1242	1242	lincRNA
LSU-rRNA_Hsa_copy104	chr8	69218441	69218796	-	1242	1242	rRNA
hsa-miR-128	chr2	136423016	136423036	+	1241	1241	miRNA
hsa-mir-128-2	chr3	35785968	35786051	+	1241	1241	miRNA
EYA2	chr20	45523263	45817492	+	1238	1238	RefSeq
GPR98	chr5	89854617	90460033	+	1237	1237	RefSeq
GRID2	chr4	93225550	94693649	+	1234	1234	RefSeq
NFIB1	chr9	14081842	14398982	-	1231	1231	RefSeq_antisense
ASGR1	chr17	7076751	7082883	-	1229	1229	RefSeq
RGS61	chr14	72398817	73029462	+	1229	1229	RefSeq_antisense
hsa-miR-484	chr16	15737158	15737179	+	1226	1226	miRNA
hsa-mir-484	chr16	15737151	15737229	+	1226	1226	miRNA
hsa-miR-374a-5p	chrX	73507160	73507181	-	1224	1224	miRNA
FAM19A51	chr22	48885288	49147744	+	1221	1221	RefSeq_antisense
5S_copy208	chr6	68177112	68177199	-	1221	1221	rRNA
5S_copy91	chr2	163353447	163353535	+	1219	1219	rRNA
5S_copy269	chr8	25994397	25994515	+	1218	1218	rRNA
ILF3	chr19	10764937	10803095	+	1216	1216	RefSeq
hsa-miR-374b-5p	chrX	73438422	73438443	-	1215	1215	miRNA
KCNQ3	chr8	133133105	133493004	-	1215	1215	RefSeq
HID11	chr17	72946839	72968900	-	1215	1215	RefSeq_antisense
U3	chr17	19091329	19091545	+	1213	1213	CDBox
BARHL2	chr1	91177579	91182794	-	1213	1213	RefSeq
U3:RF00012.44	chr17	19091329	19091545	+	1213	1213	rfam
FUT8	chr14	65877310	66210839	+	1211	1211	RefSeq
U83B	chr22	39709824	39709916	-	1210	1210	CDBox
FUT8:copy2	chr14	65879448	66210839	+	1210	1210	other_ncRNA
snoU83B:RF00593.2	chr22	39709824	39709916	-	1210	1210	rfam
U63	chr5	137896732	137896799	-	1209	1209	CDBox
LSU-rRNA_Hsa_copy84	chr6	133593945	133594166	+	1209	1209	rRNA
piR-36713	chr22	39709885	39709913	-	1207	1207	piRNA
piR-36714	chr22	39709884	39709913	-	1207	1207	piRNA
piR-36715	chr22	39709883	39709913	-	1207	1207	piRNA
piR-36716	chr22	39709882	39709913	-	1207	1207	piRNA
piR-41794	chr22	39709884	39709911	-	1207	1207	piRNA
FAM19A5:copy21	chr22	48972118	49147744	+	1204	1204	RefSeq_antisense
TGFBR3	chr1	92145900	92371559	-	1203	1203	other_ncRNA
NLRP21	chr19	55476652	55512510	+	1201	1201	RefSeq_antisense
KREMEN1	chr22	29469066	29564321	+	1199	1199	RefSeq
CALN11	chr7	71244476	71877360	-	1197	1197	RefSeq_antisense
5S_copy292	chr8	141950661	141950763	+	1196	1196	rRNA
ANKRD44	chr2	197851386	198175521	-	1194	1194	RefSeq
C8A	chr1	57320443	57383894	+	1194	1194	RefSeq
LCMT11	chr16	25123047	25189551	+	1194	1194	RefSeq_antisense
Y_RNA:RF00019.262	chr5	17117685	17117795	-	1190	1190	rfam
RABGAP1L1	chr1	174128552	174927327	+	1189	1189	RefSeq_antisense
SOX61	chr11	15987995	16497935	-	1188	1188	RefSeq_antisense
Y_RNA:RF00019.354	chr7	6252269	6252371	-	1188	1188	rfam
piR-30840	chr5	137896735	137896762	-	1186	1186	piRNA
hsa-mir-99a	chr21	17911409	17911489	+	1185	1185	miRNA
PKP41	chr2	159313476	159537940	+	1184	1184	RefSeq_antisense
LOC100505875	chr4	79892902	80229953	+	1182	1182	other_ncRNA
AOAH	chr7	36552549	36764154	-	1179	1179	RefSeq
Metazoa_SRP:RF00017.702	chr16	58804428	58804724	+	1178	1178	rfam
KIF5C1	chr2	149632792	149883273	+	1177	1177	RefSeq_antisense
ARID5B	chr10	63661013	63856707	+	1176	1176	RefSeq
C9orf911	chr9	117373706	117408703	+	1176	1176	RefSeq_antisense
CAMKMT1	chr2	44589043	44999731	+	1172	1172	RefSeq_antisense
linc-NPHS2-2	chr1	179798744	179805259	-	1170	1170	lincRNA
tRNA-Gly-GGA_copy15	chr2	211796824	211796861	+	1168	1168	tRNA_like
piR-53985	chr1	179804979	179805006	-	1167	1167	piRNA
tRNA-Gly-GGA_copy59	chr10	17350048	17350084	-	1167	1167	tRNA_like
LSU-rRNA_Hsa_copy27	chr2	65103097	65103154	-	1165	1165	rRNA
LOC349160:antisense	chr7	136583520	136849088	-	1163	1163	other_ncRNA_antisense
linc-HHIPL1:antisense	chr14	100070893	100092074	+	1160	1160	lincRNA_antisense
PDE1A1	chr2	183004762	183387572	-	1160	1160	RefSeq_antisense
Y_RNA:RF00019.464	chr9	117377735	117377848	-	1159	1159	rfam
STPG2	chr4	98480025	99064391	-	1158	1158	RefSeq
CLDN10-AS1	chr13	96131698	96186164	-	1156	1156	other_ncRNA
RBMS3	chr3	29322803	30051886	+	1151	1151	RefSeq
ZNF704	chr8	81540686	81787016	-	1150	1150	RefSeq
MYO3B1	chr2	171034655	171511674	+	1147	1147	RefSeq_antisense
OGFOD3:antisense	chr17	80347086	80376513	-	1144	1144	other_ncRNA_antisense
RABGAP1L	chr1	174128552	174927327	+	1144	1144	RefSeq
KIF13B	chr8	28924795	29120610	-	1139	1139	RefSeq
FLJ30838:antisense	chr2	58747888	59290901	+	1137	1137	other_ncRNA_antisense
ITGA11	chr15	68594042	68724492	-	1133	1133	RefSeq
COL4A1	chr13	110801310	110959496	-	1131	1131	RefSeq
MAGI2	chr7	77646374	79082890	-	1130	1130	RefSeq
PARP12	chr7	139723549	139763521	-	1130	1130	RefSeq
Y_RNA:RF00019.771	chr17	80375102	80375197	+	1129	1129	rfam
Y_RNA:RF00019.502	chr10	102158109	102158203	-	1128	1128	rfam
MYO1D	chr17	30819628	31203902	-	1127	1127	RefSeq
U8:RF00096.11	chr9	38147425	38147558	+	1124	1124	rfam
SNHG12	chr1	28905050	28908366	-	1123	1123	other_ncRNA
C8orf74	chr8	10530147	10558103	+	1123	1123	RefSeq
linc-UBE3A:antisense	chr15	25729978	25823938	-	1120	1120	lincRNA_antisense
GALNTL61	chr4	172734575	173961558	+	1120	1120	RefSeq_antisense
GJB71	chr6	87992697	88038996	-	1119	1119	RefSeq_antisense
hsa-mir-133a-1	chr18	19405659	19405746	-	1118	1118	miRNA
hsa-mir-133a-2	chr20	61162119	61162220	+	1118	1118	miRNA
hsa-miR-1307-3p	chr10	105154058	105154079	-	1115	1115	miRNA
hsa-miR-133a	chr18	19405673	19405694	-	1115	1115	miRNA
SCUBE1	chr22	43599229	43739394	-	1113	1113	RefSeq
linc-UBE3A:copy2:antisense	chr15	25761570	25823925	-	1112	1112	lincRNA_antisense
GPR133	chr12	131438452	131626008	+	1112	1112	RefSeq
PHLPP2	chr16	71678852	71748704	-	1111	1111	RefSeq
5S_copy265	chr8	10544079	10544191	+	1111	1111	rRNA
JAKMIP2-AS1:antisense	chr5	146939557	147041572	+	1109	1109	other_ncRNA_antisense
CHRM2	chr7	136553399	136701771	+	1106	1106	RefSeq
PRKG1	chr10	52750911	54058110	+	1106	1106	RefSeq
PLCB41	chr20	9049701	9461462	+	1104	1104	RefSeq_antisense
PNPLA11	chr6	36210945	36276372	+	1104	1104	RefSeq_antisense
KCNB21	chr8	73449626	73850584	+	1099	1099	RefSeq_antisense
PCM11	chr8	17780366	17887457	+	1095	1095	RefSeq_antisense
MCU1	chr10	74451889	74647452	+	1094	1094	RefSeq_antisense
TNS1	chr2	218664512	218808796	-	1091	1091	RefSeq
HCN11	chr5	45255052	45696220	-	1089	1089	RefSeq_antisense
FUT81	chr14	65877310	66210839	+	1088	1088	RefSeq_antisense
FUT8:copy2:antisense	chr14	65879448	66210839	+	1087	1087	other_ncRNA_antisense
MBNL21	chr13	97874550	98046374	+	1085	1085	RefSeq_antisense
KCNIP41	chr4	20730239	21950374	-	1084	1084	RefSeq_antisense
EEF1B2	chr2	207024318	207027653	+	1083	1083	RefSeq
U5:RF00020.28	chr15	65588389	65588504	+	1082	1082	rfam
LSU-rRNA_Hsa_copy23	chr2	59830731	59830959	-	1080	1080	rRNA
PXDNL1	chr8	52232137	52722005	-	1079	1079	RefSeq_antisense
DDO	chr6	110713383	110736753	-	1078	1078	RefSeq
OSBPL1A	chr18	21742011	21977833	-	1077	1077	RefSeq
PACRG1	chr6	163148164	163736524	+	1074	1074	RefSeq_antisense
RIPK2	chr8	90769975	90803292	+	1072	1072	RefSeq
LSU-rRNA_Hsa_copy218	chrUn_gl000220	114133	114194	+	1072	1072	rRNA
LSU-rRNA_Hsa_copy223	chrUn_gl000220	158105	158166	+	1072	1072	rRNA
linc-BMP10	chr2	69135047	69145027	-	1071	1071	lincRNA
hsa-mir-490	chr7	136587914	136588041	+	1062	1062	miRNA
CALN1	chr7	71244476	71877360	-	1052	1052	RefSeq
U51	chr2	207026605	207026674	+	1051	1051	CDBox
PRKG1:copy2	chr10	52834234	54058110	+	1051	1051	RefSeq
LSU-rRNA_Hsa_copy33	chr2	159440392	159440797	-	1051	1051	rRNA
snoZ196:RF00134.1	chr2	207026565	207026653	+	1050	1050	rfam
PTPRT1	chr20	40701392	41818557	-	1046	1046	RefSeq_antisense
DNMT3A1	chr2	25455830	25565459	-	1045	1045	RefSeq_antisense
BCYRN1	chrX	70430035	70948962	-	1041	1041	other_ncRNA
PID11	chr2	229888689	230136057	-	1041	1041	RefSeq_antisense
hsa-miR-99a-5p	chr21	17911421	17911442	+	1039	1039	miRNA
Metazoa_SRP:RF00017.399	chr8	81688901	81689197	-	1039	1039	rfam
LSU-rRNA_Hsa_copy153	chr12	38531458	38531930	+	1037	1037	rRNA
U3-2	chr17	18965225	18965441	+	1036	1036	CDBox
U3-2B	chr17	18967233	18967449	-	1036	1036	CDBox
DPP10:copy31	chr2	115822247	116602311	+	1036	1036	RefSeq_antisense
U3:RF00012.41	chr17	18965225	18965441	+	1036	1036	rfam
U3:RF00012.42	chr17	18967233	18967449	-	1036	1036	rfam
CTNNA31	chr10	67679725	69455949	-	1034	1034	RefSeq_antisense
mgh28S-2409	chr11	93466394	93466466	-	1033	1033	CDBox
linc-MTHFSD-4:antisense	chr16	87172049	87188136	-	1028	1028	lincRNA_antisense
ANK31	chr10	61786056	62493284	-	1028	1028	RefSeq_antisense
DNMT3A:copy21	chr2	25504321	25565459	-	1027	1027	RefSeq_antisense
KAZN	chr1	14925213	15444544	+	1026	1026	RefSeq
SRPK21	chr7	104756821	105029377	-	1026	1026	RefSeq_antisense
LSU-rRNA_Hsa_copy86	chr6	144692028	144692175	-	1025	1025	rRNA
CTNNA2	chr2	79740060	80875988	+	1024	1024	RefSeq
NEBL1	chr10	21068903	21463116	-	1022	1022	RefSeq_antisense
ATP5B	chr12	57031959	57039852	-	1019	1019	RefSeq
CASP71	chr10	115438921	115490668	+	1016	1016	RefSeq_antisense
piR-31612	chr2	207026645	207026674	+	1013	1013	piRNA
PLD5	chr1	242251689	242687998	-	1011	1011	RefSeq
RPL23A	chr17	27047000	27051374	+	1011	1011	RefSeq
PBX11	chr1	164528597	164821060	+	1011	1011	RefSeq_antisense
MACROD2	chr20	13976146	16033841	+	1010	1010	RefSeq
linc-CDK17-4:antisense	chr12	98879322	98897676	-	1008	1008	lincRNA_antisense
linc-CDK17-4:copy2:antisense	chr12	98881637	98897676	-	1006	1006	lincRNA_antisense
SSU-rRNA_Hsa_copy33	chr21	27228059	27228147	+	1006	1006	rRNA
Y_RNA:RF00019.494	chr10	90345395	90345490	-	1005	1005	rfam
CLIC41	chr1	25071760	25170815	+	1004	1004	RefSeq_antisense
BTNL8	chr5	180326077	180377906	+	1003	1003	RefSeq
ASIC21	chr17	31340106	32483825	-	1000	1000	RefSeq_antisense
TOX	chr8	59717977	60031767	-	999	999	RefSeq
chr12.tRNA5-AspGTC	chr12	98897281	98897352	+	999	999	tRNA
DDX59	chr1	200613165	200639126	-	998	998	RefSeq
COL23A1	chr5	177664617	178017556	-	996	996	RefSeq
CTNND2	chr5	10971952	11904110	-	995	995	RefSeq
SHISA91	chr16	12995477	13334273	+	993	993	RefSeq_antisense
EML2	chr19	46112658	46148775	-	991	991	other_ncRNA
PPP2R2B1	chr5	145969067	146461033	-	991	991	RefSeq_antisense
Y_RNA:RF00019.628	chr13	92238188	92238295	+	990	990	rfam
U3-3	chr17	19093342	19093558	-	989	989	CDBox
ROBO21	chr3	77089294	77699114	+	989	989	RefSeq_antisense
U3:RF00012.45	chr17	19093342	19093558	-	989	989	rfam
CDKAL1	chr6	20534688	21232634	+	985	985	RefSeq
DPP10:copy41	chr2	115919513	116602326	+	984	984	RefSeq_antisense
Y_RNA:RF00019.419	chr8	71693149	71693243	-	982	982	rfam
LSU-rRNA_Hsa_copy211	chr22	21265392	21265525	+	982	982	rRNA
C18orf32	chr18	47007548	47018935	-	980	980	RefSeq
SUPT3H1	chr6	44794467	45345788	-	980	980	RefSeq_antisense
FHIT1	chr3	59735036	61237133	-	979	979	RefSeq_antisense
5S_copy439	chr13	98015266	98015355	-	979	979	rRNA
Y_RNA:RF00019.178	chr3	101347154	101347250	-	976	976	rfam
BTNL8:copy2	chr5	180336564	180377906	+	969	969	RefSeq
RPL17	chr18	47014851	47018935	-	969	969	RefSeq
GALNTL6	chr4	172734575	173961558	+	968	968	RefSeq
Metazoa_SRP:RF00017.327	chr6	134454711	134455006	+	968	968	rfam
DKFZp686K1684:antisense	chr11	31838114	31908587	+	964	964	other_ncRNA_antisense
DHFR	chr5	79922045	79950800	-	963	963	RefSeq
NAALADL2	chr3	174577111	175523428	+	962	962	RefSeq
CNTN5	chr11	98891706	100229616	+	959	959	RefSeq
5S_copy275	chr8	36621963	36622036	+	955	955	rRNA
CACNA2D3	chr3	54156693	55108584	+	954	954	RefSeq
CAMKMT	chr2	44589043	44999731	+	954	954	RefSeq
U25	chr11	62623037	62623103	-	951	951	CDBox
hsa-miR-192-5p	chr11	64658675	64658695	-	951	951	miRNA
hsa-mir-192	chr11	64658609	64658718	-	951	951	miRNA
AKAP13	chr15	85923847	86292589	+	950	950	RefSeq
ANKRD44:copy2	chr2	197964195	198175521	-	949	949	RefSeq
FRMD4A1	chr10	13685706	14372866	-	949	949	RefSeq_antisense
LHFPL3	chr7	103969104	104549003	+	947	947	RefSeq
TMEM132D1	chr12	129556271	130388212	-	947	947	RefSeq_antisense
hsa-mir-4425	chr1	25349994	25350077	+	945	945	miRNA
HS3ST4	chr16	25703347	26149009	+	944	944	RefSeq
LSU-rRNA_Hsa_copy39	chr2	230045631	230045734	-	944	944	rRNA
hsa-miR-4425	chr1	25350043	25350064	+	942	942	miRNA
RORA1	chr15	60780483	61521502	-	942	942	RefSeq_antisense
AGBL41	chr1	48998527	50489626	-	937	937	RefSeq_antisense
5S_copy509	chr18	21750467	21750587	-	936	936	rRNA
LANCL1	chr2	211295973	211341499	-	933	933	RefSeq
Y_RNA:RF00019.75	chr1	224456730	224456787	-	931	931	rfam
hsa-miR-16-2-3p	chr3	160122585	160122606	+	930	930	miRNA
KCTD201	chr6	36410544	36458315	+	929	929	RefSeq_antisense
TEX41	chr2	145425534	145834291	+	923	923	other_ncRNA
LIMCH1	chr4	41362804	41702061	+	922	922	RefSeq
CMSS11	chr3	99536678	99897476	+	922	922	RefSeq_antisense
FAM107B	chr10	14560559	14816896	-	921	921	RefSeq
ANKS1B1	chr12	99128569	100378432	-	921	921	RefSeq_antisense
C5orf34	chr5	43486803	43515273	-	919	919	RefSeq
TMEM132D	chr12	129556271	130388212	-	917	917	RefSeq
NCAM1	chr11	112831969	113149158	+	916	916	RefSeq
hsa-mir-625	chr14	65937820	65937904	+	914	914	miRNA
chr16.tRNA34-GlyCCC	chr16	686736	686806	-	914	914	tRNA
hsa-miR-17-3p	chr13	92002909	92002930	+	912	912	miRNA
PIK3AP1	chr10	98353069	98480279	-	911	911	RefSeq
LSU-rRNA_Hsa_copy157	chr12	75347341	75347450	-	911	911	rRNA
tRNA-Gly-GGY_copy15	chr11	31858423	31858458	-	911	911	tRNA_like
MYO9A1	chr15	72118361	72410440	-	906	906	RefSeq_antisense
linc-PPIL5-2:antisense	chr14	46178990	46326043	+	902	902	lincRNA_antisense
piR-34342	chrM	3004	3031	+	902	902	piRNA
HMBOX11	chr8	28747911	28910242	+	902	902	RefSeq_antisense
CMC21	chr16	81009699	81040502	-	901	901	RefSeq_antisense
KCNIP4	chr4	20730239	21950374	-	899	899	RefSeq
DMD	chrX	31137345	33357726	-	897	897	RefSeq
IL1RAPL1	chrX	28605681	29974017	+	897	897	RefSeq
piR-31986	chr2	117781155	117781182	+	893	893	piRNA
piR-31987	chr2	117781155	117781183	+	893	893	piRNA
hsa-mir-330	chr19	46142252	46142345	-	892	892	miRNA
PEX14	chr1	10535003	10690815	+	891	891	RefSeq
CISD31	chr17	36886510	36891858	+	891	891	RefSeq_antisense
piR-31636	chr2	117781158	117781185	+	890	890	piRNA
hsa-mir-301b	chr22	22007270	22007347	+	889	889	miRNA
TMEM164	chrX	109245863	109421016	+	888	888	RefSeq
DGKB1	chr7	14184674	14881075	-	886	886	RefSeq_antisense
hsa-miR-301b	chr22	22007314	22007336	+	885	885	miRNA
FAM20A	chr17	66531257	66597095	-	884	884	other_ncRNA
U60	chr16	2205024	2205106	-	883	883	CDBox
GABRG3	chr15	27216429	27778373	+	883	883	RefSeq
CELF21	chr10	11047259	11378672	+	882	882	RefSeq_antisense
ARHGAP10	chr4	148653453	148993927	+	881	881	RefSeq
linc-TMEM72-2:copy2:antisense	chr10	44357351	44476390	+	880	880	lincRNA_antisense
PAFAH1B1	chr17	2496923	2588909	+	880	880	RefSeq
CCDC941	chr19	4247111	4269085	+	879	879	RefSeq_antisense
CELF2:copy21	chr10	11059893	11378672	+	879	879	RefSeq_antisense
DGKB:copy21	chr7	14215606	14881075	-	878	878	RefSeq_antisense
5S_copy498	chr17	36888053	36888173	-	878	878	rRNA
MSRA	chr8	9911830	10286401	+	876	876	RefSeq
EFHC11	chr6	52284994	52360583	+	876	876	RefSeq_antisense
EFHC1:copy21	chr6	52285805	52360583	+	876	876	RefSeq_antisense
SLC12A91	chr7	100450341	100464634	+	875	875	RefSeq_antisense
WDR641	chr1	241815580	241965434	+	874	874	RefSeq_antisense
U5:RF00020.1	chr1	11968209	11968328	+	873	873	rfam
GNB2L1	chr5	180663928	180670906	-	869	869	RefSeq
DIAPH2	chrX	95939662	96855597	+	868	868	RefSeq
PDGFRA	chr4	55095264	55164412	+	867	867	RefSeq
PRKAR1A:copy21	chr17	66507921	66547457	+	867	867	RefSeq_antisense
TMEM72-AS1:antisense	chr10	45306472	45455137	-	865	865	other_ncRNA_antisense
SLC5A8	chr12	101549994	101604016	-	865	865	RefSeq
SPEF2	chr5	35617989	35814713	+	865	865	RefSeq
BTBD91	chr6	38136227	38607924	-	864	864	RefSeq_antisense
U78	chr1	173834760	173834824	-	863	863	CDBox
ROR1	chr1	64239690	64647179	+	863	863	RefSeq
PPP1R13B1	chr14	104200088	104313927	-	862	862	RefSeq_antisense
linc-TMEM72-2:copy3:antisense	chr10	44404727	44478430	+	859	859	lincRNA_antisense
SIPA1L31	chr19	38397868	38699008	+	859	859	RefSeq_antisense
CTNNA21	chr2	79740060	80875988	+	858	858	RefSeq_antisense
linc-TMEM72-2:copy5:antisense	chr10	44438685	44479412	+	856	856	lincRNA_antisense
BCAS3	chr17	58755172	59470199	+	855	855	RefSeq
CASK	chrX	41374189	41782287	-	855	855	RefSeq
CEP1121	chr17	63631658	64188212	-	854	854	RefSeq_antisense
NBEA1	chr13	35516424	36246873	+	854	854	RefSeq_antisense
tRNA-Glu-GAG_copy6	chr4	86243640	86243674	+	853	853	tRNA_like
ATP5A1	chr18	43664110	43684199	-	852	852	RefSeq
DPY19L31	chr19	32896655	32976799	+	852	852	RefSeq_antisense
Metazoa_SRP:RF00017.72	chr1	164672263	164672546	-	852	852	rfam
tRNA-Glu-GAG__copy31	chr9	116140451	116140491	-	851	851	tRNA_like
tRNA-Glu-GAG_copy15	chr10	44446481	44446515	-	851	851	tRNA_like
C10orf112	chr10	77542519	78317126	+	850	850	RefSeq_antisense
ROBO11	chr3	78646388	79817059	-	850	850	RefSeq_antisense
LRP1B	chr2	140988996	142889270	-	849	849	RefSeq
FAF11	chr1	50906935	51425936	-	849	849	RefSeq_antisense
FRMD4B1	chr3	69219146	69435430	-	849	849	RefSeq_antisense
PPME11	chr11	73882108	73965748	+	847	847	RefSeq_antisense
GRIA3	chrX	122318096	122624766	+	846	846	RefSeq
DAB1	chr1	57463579	58716211	-	845	845	RefSeq
DCC	chr18	49866542	51062273	+	844	844	RefSeq
linc-CTDSP2-2	chr12	58263619	58290267	-	843	843	lincRNA
SYNE11	chr6	152442819	152958534	-	843	843	RefSeq_antisense
KLHL29	chr2	23608298	23931483	+	842	842	RefSeq
RAB3GAP2	chr1	220321610	220445843	-	842	842	RefSeq
RSRC11	chr3	157827841	158262624	+	842	842	RefSeq_antisense
SIL11	chr5	138282410	138534065	-	842	842	RefSeq_antisense
LOC100130691:antisense	chr2	178148236	178257419	-	840	840	other_ncRNA_antisense
EYS1	chr6	64429876	66417118	-	840	840	RefSeq_antisense
ZNF75A1	chr16	3355433	3368576	+	838	838	RefSeq_antisense
GLI3	chr7	42000548	42276618	-	834	834	RefSeq
5S_copy10	chr1	74215219	74215309	-	833	833	rRNA
linc-RASSF4	chr10	45432956	45451173	+	831	831	lincRNA
ABL2	chr1	179068462	179198819	-	831	831	RefSeq
RABGGTB	chr1	76251879	76260775	+	830	830	other_ncRNA
chr11.tRNA17-ValTAC	chr11	59318102	59318174	-	830	830	tRNA
ABL2:copy2	chr1	179079716	179198819	-	827	827	RefSeq
RHOU	chr1	228780394	228882416	+	823	823	other_ncRNA
hsa-mir-92b	chr1	155164968	155165063	+	821	821	miRNA
PPP1R12B	chr1	202317830	202557697	+	821	821	RefSeq
XIRP2	chr2	167744997	168116261	+	820	820	RefSeq
MEIS1	chr2	66662532	66799891	+	817	817	RefSeq
U106	chr20	47895482	47895560	+	815	815	CDBox
NFASC1	chr1	204797782	204991950	+	815	815	RefSeq_antisense
TRPM31	chr9	73149966	73736514	-	815	815	RefSeq_antisense
chr18.tRNA4-LysCTT	chr18	43669271	43669343	-	815	815	tRNA
hsa-miR-92b-3p	chr1	155165028	155165049	+	814	814	miRNA
5S_copy381	chr11	73909810	73909899	-	813	813	rRNA
hsa-mir-652	chrX	109298557	109298654	+	812	812	miRNA
TEX101	chr19	43892763	43922767	+	812	812	RefSeq
WDR71	chr18	54318616	54697036	+	812	812	RefSeq_antisense
SSU-rRNA_Hsa_copy12	chr6	150665154	150665281	+	812	812	rRNA
U18B	chr15	66794360	66794429	-	811	811	CDBox
Metazoa_SRP:RF00017.308	chr6	36418689	36418978	-	811	811	rfam
hsa-mir-513c	chrX	146271222	146271305	-	809	809	miRNA
U104	chr17	62223438	62223517	+	808	808	CDBox
ZBTB7C	chr18	45553639	45663680	-	806	806	RefSeq
tRNA-His-CAY__copy32	chr11	109473924	109473959	+	806	806	tRNA_like
hsa-miR-652-3p	chrX	109298617	109298637	+	805	805	miRNA
TMEM55A	chr8	92006502	92053203	-	804	804	RefSeq
MAGI21	chr7	77646374	79082890	-	804	804	RefSeq_antisense
hsa-miR-330-3p	chr19	46142267	46142289	-	803	803	miRNA
PTPRD	chr9	8314246	10612723	-	803	803	RefSeq
chrX.tRNA4-ValTAC	chrX	18693029	18693101	-	802	802	tRNA
PCDH151	chr10	55562533	56561051	-	801	801	RefSeq_antisense
COPZ2	chr17	46103533	46115152	-	800	800	RefSeq
PCDH15:copy21	chr10	55568452	56561051	-	800	800	RefSeq_antisense
hsa-miR-513c-5p	chrX	146271271	146271292	-	799	799	miRNA
PCDH15:copy31	chr10	55580860	56561051	-	799	799	RefSeq_antisense
NEGR1	chr1	71868625	72748277	-	798	798	RefSeq
chr1.tRNA84-GluTTC	chr1	161391883	161391954	-	798	798	tRNA
THTPA:antisense	chr14	23980969	24028790	+	797	797	other_ncRNA_antisense
chr1.tRNA134-GluTTC	chr1	16861774	16861845	-	797	797	tRNA
U34	chr19	49994164	49994229	+	796	796	CDBox
RBFOX1	chr16	6069132	7763340	+	794	794	RefSeq
TRIM210	chr4	154074270	154260474	+	794	794	RefSeq_antisense
linc-KCND3-2	chr1	112635477	112686569	-	791	791	lincRNA
hsa-mir-152	chr17	46114527	46114613	-	791	791	miRNA
5S_copy101	chr2	212400378	212400467	+	791	791	rRNA
LSU-rRNA_Hsa_copy95	chr7	104966298	104966532	+	789	789	rRNA
U82	chr2	232325079	232325153	-	788	788	CDBox
piR-33527	chr19	49994164	49994191	+	788	788	piRNA
piR-58186	chr19	49994165	49994191	+	788	788	piRNA
MYO9B1	chr19	17186591	17324104	+	788	788	RefSeq_antisense
piR-33526	chr19	49994164	49994190	+	787	787	piRNA
U79	chr1	173834486	173834570	-	786	786	CDBox
NUMB	chr14	73741918	73925286	-	786	786	RefSeq
CMSS1:copy21	chr3	99833774	99897476	+	785	785	RefSeq_antisense
LSU-rRNA_Hsa_copy166	chr14	23986958	23987095	-	785	785	rRNA
5S_copy271	chr8	28906032	28906120	-	784	784	rRNA
hsa-miR-152	chr17	46114540	46114560	-	783	783	miRNA
TRIM621	chr1	33611003	33647671	-	782	782	RefSeq_antisense
LZTS1-AS1	chr8	20133284	20147969	+	781	781	other_ncRNA
SYT61	chr1	114631914	114696472	-	781	781	RefSeq_antisense
RBFOX11	chr16	6069132	7763340	+	780	780	RefSeq_antisense
ASIC1	chr12	50451420	50477405	+	779	779	RefSeq
5S_copy217	chr6	121007767	121007858	+	777	777	rRNA
HACE11	chr6	105175968	105307794	-	776	776	RefSeq_antisense
AEBP21	chr12	19592608	19675173	+	775	775	RefSeq_antisense
5S_copy203	chr6	41207256	41207363	-	775	775	rRNA
CHM1	chrX	85116185	85302566	-	774	774	RefSeq_antisense
chr6.tRNA7-LeuCAG	chr6	26521436	26521518	+	773	773	tRNA
linc-ANKFN1:antisense	chr17	53900146	53930115	+	772	772	lincRNA_antisense
ASIC1:copy2	chr12	50467368	50477405	+	772	772	RefSeq
DOCK10	chr2	225629807	225907330	-	772	772	RefSeq
KAZN:copy2	chr1	15250625	15394651	+	772	772	RefSeq
KAZN:copy3	chr1	15256296	15394651	+	771	771	RefSeq
LOC100506207	chr6	8435856	8785678	+	770	770	other_ncRNA
SEMA3E1	chr7	82993222	83278479	-	770	770	RefSeq_antisense
Y_RNA:RF00019.743	chr17	31157237	31157347	-	770	770	rfam
chr1.tRNA34-LeuCAG	chr1	161411323	161411405	+	770	770	tRNA
chr1.tRNA36-LeuCAG	chr1	161418741	161418823	+	770	770	tRNA
chr1.tRNA38-LeuCAG	chr1	161426122	161426204	+	770	770	tRNA
chr1.tRNA40-LeuCAG	chr1	161433532	161433614	+	770	770	tRNA
chr1.tRNA42-LeuCAG	chr1	161440913	161440995	+	770	770	tRNA
chr16.tRNA26-LeuCAG	chr16	57334392	57334474	-	770	770	tRNA
SLC24A3	chr20	19193290	19703541	+	769	769	RefSeq
chr1.tRNA67-LeuCAG	chr1	161500132	161500214	-	769	769	tRNA
FTO	chr16	53737875	54148379	+	768	768	RefSeq
RPL13	chr16	89627065	89633237	+	768	768	RefSeq
chr16.tRNA17-LeuCAG	chr16	57333863	57333945	+	768	768	tRNA
LOC100873065	chrX	22277914	23311263	-	767	767	other_ncRNA
TRPM7	chr15	50849352	50979012	-	766	766	RefSeq
POU6F2	chr7	39017609	39504390	+	765	765	RefSeq
NDST41	chr4	115748927	116035032	-	765	765	RefSeq_antisense
RBM47	chr4	40425272	40631883	-	764	764	RefSeq
CACNA2D11	chr7	81579418	82073031	-	764	764	RefSeq_antisense
MRVI1	chr11	10594638	10715535	-	763	763	RefSeq
ULK4	chr3	41288090	42003660	-	762	762	RefSeq
5S_copy268	chr8	20147685	20147774	+	761	761	rRNA
tRNA-Leu-CTG_copy1	chr1	242466330	242466365	-	761	761	tRNA_like
PPP1R12B:copy2	chr1	202431871	202557697	+	759	759	RefSeq
VPS35	chr16	46693589	46723144	-	759	759	RefSeq
chr2.tRNA27-GlyCCC	chr2	70476123	70476193	-	758	758	tRNA
GNG12-AS1:antisense	chr1	68297971	68668670	+	757	757	other_ncRNA_antisense
ZFYVE9	chr1	52607766	52812358	+	757	757	RefSeq
FOXJ31	chr1	42642210	42801548	-	757	757	RefSeq_antisense
RELN1	chr7	103112231	103629963	-	757	757	RefSeq_antisense
KANK4	chr1	62701837	62785083	-	755	755	RefSeq
linc-SMARCA2-2:antisense	chr9	1633518	1929562	+	754	754	lincRNA_antisense
GPC61	chr13	93879078	95060273	+	751	751	RefSeq_antisense
PRKD11	chr14	30045687	30396899	-	750	750	RefSeq_antisense
CSMD3	chr8	113235159	114449242	-	749	749	RefSeq
EIF4H	chr7	73588706	73611429	+	749	749	RefSeq
PRRC2B	chr9	134305477	134375575	+	746	746	RefSeq
SEMA6D	chr15	47476403	48066420	+	746	746	RefSeq
CTPS21	chrX	16606122	16731059	-	746	746	RefSeq_antisense
TRIM2:copy21	chr4	154125598	154260474	+	746	746	RefSeq_antisense
ARSG	chr17	66255323	66417000	+	745	745	RefSeq
GRID21	chr4	93225550	94693649	+	745	745	RefSeq_antisense
SRGAP31	chr3	9022276	9291369	-	742	742	RefSeq_antisense
linc-NDUFB4-5	chr3	119813742	119855628	+	739	739	lincRNA
KLHL13	chrX	117031776	117251303	-	739	739	RefSeq
ITFG1	chr16	47189298	47495015	-	738	738	RefSeq
CSDE11	chr1	115259534	115300671	-	738	738	RefSeq_antisense
ITPR1	chr3	4535032	4889524	+	736	736	RefSeq
PLXDC2	chr10	20105372	20569115	+	736	736	RefSeq
NRXN11	chr2	50145643	51259674	-	736	736	RefSeq_antisense
Y_RNA:RF00019.457	chr9	98865361	98865456	-	736	736	rfam
GPC6	chr13	93879078	95060273	+	735	735	RefSeq
HS6ST3	chr13	96743093	97491816	+	735	735	RefSeq
PLBD1	chr12	14656597	14720791	-	734	734	RefSeq
RALGAPB	chr20	37101486	37207504	+	734	734	RefSeq
PTPRM1	chr18	7567314	8406859	+	734	734	RefSeq_antisense
ACER3	chr11	76571917	76734850	+	733	733	RefSeq
ZNF385B1	chr2	180306711	180726232	-	732	732	RefSeq_antisense
Y_RNA:RF00019.43	chr1	115270341	115270445	+	728	728	rfam
LOC100288637:antisense	chr15	30938318	31065209	+	727	727	other_ncRNA_antisense
linc-IER3	chr6	30807303	30815936	-	725	725	lincRNA
CDKN3	chr14	54863673	54886934	+	724	724	RefSeq
ARSG:copy2	chr17	66287636	66417000	+	723	723	RefSeq
RFX3	chr9	3224647	3525983	-	723	723	RefSeq
FHOD31	chr18	33877702	34360018	+	723	723	RefSeq_antisense
TBC1D12	chr10	96162186	96296089	+	722	722	RefSeq
C19orf471	chr19	40826967	40854434	-	722	722	RefSeq_antisense
FAM160A11	chr4	152330398	152584784	+	722	722	RefSeq_antisense
LOC100288637:copy2:antisense	chr15	30950920	31065209	+	721	721	other_ncRNA_antisense
tRNA-Gly-GGY_copy19	chr13	89494694	89494729	+	721	721	tRNA_like
PCDH11Y:copy2	chrY	4924131	5610269	+	720	720	RefSeq
RFX3:copy2	chr9	3247037	3525983	-	720	720	RefSeq
EYA3	chr1	28296855	28415148	-	719	719	RefSeq
BAI31	chr6	69345632	70099403	+	718	718	RefSeq_antisense
CREB51	chr7	28338940	28865511	+	718	718	RefSeq_antisense
Metazoa_SRP:RF00017.197	chr3	119840756	119841053	+	718	718	rfam
hsa-mir-590	chr7	73605528	73605624	+	717	717	miRNA
WWOX	chr16	78133327	79246564	+	717	717	RefSeq
SLC24A31	chr20	19193290	19703541	+	717	717	RefSeq_antisense
ABCB111	chr2	169779449	169887833	-	715	715	RefSeq_antisense
HIVEP31	chr1	41972036	42384378	-	715	715	RefSeq_antisense
linc-DPP10:antisense	chr2	114737146	114764887	+	714	714	lincRNA_antisense
hsa-miR-361-5p	chrX	85158686	85158707	-	714	714	miRNA
ADCY81	chr8	131792547	132052835	-	713	713	RefSeq_antisense
GFPT1	chr2	69546901	69614386	-	712	712	RefSeq
ERBB4	chr2	212240442	213403352	-	711	711	RefSeq
5S_copy96	chr2	189141483	189141571	-	711	711	rRNA
CNTN5:copy2	chr11	99426876	100229616	+	710	710	RefSeq
DDX54	chr12	113594978	113623284	-	709	709	RefSeq
PLCB1	chr20	8112912	8865547	+	709	709	RefSeq
PPP1R16B	chr20	37434348	37551667	+	708	708	RefSeq
NEK111	chr3	130745694	131069309	+	708	708	RefSeq_antisense
HDAC9:copy2	chr7	18535369	19036992	+	707	707	RefSeq
tRNA-Glu-GAG__copy41	chrY	3235817	3235889	+	707	707	tRNA_like
GNA141	chr9	80037995	80263232	-	706	706	RefSeq_antisense
TACR1	chr2	75273590	75426645	-	705	705	RefSeq
TACR1:copy2	chr2	75278163	75426645	-	705	705	RefSeq
CACNB21	chr10	18429606	18830688	+	705	705	RefSeq_antisense
hsa-miR-374a-3p	chrX	73507130	73507151	-	704	704	miRNA
CPNE8	chr12	39046002	39299420	-	704	704	RefSeq
tRNA-Gly-GGG_copy29	chr17	64751963	64751997	+	704	704	tRNA_like
chr6.tRNA133-ValCAC	chr6	27696327	27696399	-	702	702	tRNA
MYO1E1	chr15	59428168	59665071	-	701	701	RefSeq_antisense
U55	chr1	45241537	45241610	+	700	700	CDBox
MAGI1	chr3	65339906	66024509	-	700	700	RefSeq
SLC25A211	chr14	37147126	37641865	-	700	700	RefSeq_antisense
MAGI1:copy2	chr3	65344944	66024509	-	699	699	RefSeq
IQSEC21	chrX	53262058	53350522	-	699	699	RefSeq_antisense
KMT2C1	chr7	151832010	152133090	-	698	698	RefSeq_antisense
tRNA-Glu-GAG_copy2	chr1	202469295	202469333	+	698	698	tRNA_like
ATXN1	chr6	16299343	16761721	-	697	697	RefSeq
GAB21	chr11	77926336	78128868	-	697	697	RefSeq_antisense
DUS2L	chr16	68056847	68113226	+	696	696	RefSeq
RAPGEF1	chr9	134452157	134612925	-	696	696	RefSeq
RIT2	chr18	40323183	40695657	-	695	695	RefSeq
Y_RNA:RF00019.619	chr13	60761872	60761964	-	694	694	rfam
Y_RNA:RF00019.800	chr19	40848236	40848348	+	694	694	rfam
XPR11	chr1	180601146	180859415	+	692	692	RefSeq_antisense
JAZF1-AS1:antisense	chr7	28220076	28280996	+	690	690	other_ncRNA_antisense
GPR1801	chr13	95254104	95286899	+	690	690	RefSeq_antisense
LOC100631378:antisense	chr19	38314363	38345836	-	689	689	other_ncRNA_antisense
HAVCR11	chr5	156456531	156485970	-	689	689	RefSeq_antisense
ZCCHC161	chrX	111326253	111700473	+	689	689	RefSeq_antisense
hsa-mir-30b	chr8	135812763	135812850	-	688	688	miRNA
C6orf48:copy5	chr6	31802693	31807541	+	688	688	RefSeq
SNTG1	chr8	50824597	51705427	+	688	688	RefSeq
DPP61	chr7	153584419	154685995	+	688	688	RefSeq_antisense
NBEA	chr13	35516424	36246873	+	687	687	RefSeq
FAM172A1	chr5	92953431	93447404	-	687	687	RefSeq_antisense
ITK	chr5	156607907	156682109	+	686	686	RefSeq
COL4A4	chr2	227867427	228029275	-	685	685	RefSeq
CTPS2	chrX	16606122	16731059	-	685	685	RefSeq
RIPK11	chr6	3077058	3115421	+	685	685	RefSeq_antisense
TLK11	chr2	171847333	172087824	-	685	685	RefSeq_antisense
piR-30652	chr2	232325085	232325113	-	684	684	piRNA
EXOC6B	chr2	72406444	73053177	-	684	684	RefSeq
TBC1D16	chr17	77906142	78009657	-	683	683	RefSeq
DOCK111	chrX	117629872	117820123	+	683	683	RefSeq_antisense
PBX1	chr1	164528597	164821060	+	682	682	RefSeq
CCSER1	chr4	91048684	92523370	+	681	681	RefSeq
IMMP2L	chr7	110303106	111202573	-	681	681	RefSeq
DNAH81	chr6	38683117	38998574	+	681	681	RefSeq_antisense
Y_RNA:RF00019.596	chr12	113616228	113616324	-	681	681	rfam
CADPS1	chr3	62384021	62861064	-	680	680	RefSeq_antisense
HPSE21	chr10	100216834	100995632	-	680	680	RefSeq_antisense
CSMD31	chr8	113235159	114449242	-	679	679	RefSeq_antisense
SPAG161	chr2	214149103	215275225	+	678	678	RefSeq_antisense
hsa-miR-30b-5p	chr8	135812813	135812834	-	677	677	miRNA
FBXO42	chr1	16576559	16678948	-	677	677	RefSeq
LOC285441:antisense	chr4	187207252	187422212	-	676	676	other_ncRNA_antisense
[truncated: 60,268 more rows]
